# Supplementary material for: Synthesis, structural and magnetic properties of cobalt(ii) complexes with pyridine-based macrocyclic ligand containing two pyridine pendant arms
Source: Royal Society of Chemistry journal article supplement (doi:10.1039/d4ra02387k), 2024-01-01
Supplement: d4ra02387k1.pdf [file d4ra02387k1.pdf]

**Supplementary Materials**  
**for**  
**Synthesis, structural and magnetic properties of cobalt(II)**  
**complexes with pyridine-based macrocyclic ligand**  
**containing two pyridine pendant arms**

**Eva Zahradníková,<sup>a</sup> Céline Pichon,<sup>b</sup> Carine Duhayon,<sup>b</sup> Jean-Pascal Sutter,<sup>b\*</sup> Petr Halaš,<sup>a</sup>  
and Bohuslav Drahoš<sup>a\*</sup>**

<sup>a</sup> *Department of Inorganic Chemistry, Faculty of Science, Palacký University, 17. listopadu 12, CZ-771 46 Olomouc, Czech Republic, Fax: +420 585 634 954. Tel: +420 585 634 429. E-mail: [bohuslav.drahos@upol.cz](mailto:bohuslav.drahos@upol.cz)*

<sup>b</sup> *Laboratoire de Chimie de Coordination du CNRS (LCC-CNRS), Université de Toulouse, CNRS, Toulouse, France. E-mail : [jean-pascal.sutter@lcc-toulouse.fr](mailto:jean-pascal.sutter@lcc-toulouse.fr)*

**Table of content:**

**Figure S1** <sup>1</sup>H NMR spectrum of **L**.

**Figure S2** <sup>13</sup>C NMR spectrum of **L**.

**Figure S3** <sup>1</sup>H–<sup>1</sup>H *gs*-COSY NMR spectrum of **L**.

**Figure S4** <sup>1</sup>H–<sup>13</sup>C *gs*-HMQC NMR spectrum of **L**.

**Figure S5** <sup>1</sup>H–<sup>13</sup>C *gs*-HMBC NMR spectrum of **L**.

**Figure S6** ESI-MS spectrum of complex **1**

**Figure S7** ESI-MS spectrum of complex **2**

**Figure S8** ESI-MS spectrum of complex **3**

**Figure S9** ESI-MS spectrum of complex **4a**

**Figure S10** ESI-MS spectrum of complex **5**

**Figure S11** Comparison of IR spectra of studied complexes **1–5**.

**Figure S12** The X-ray powder diffraction patterns for complexes **1–5**.

**Figure S13** The molecular structures of the complexes **1** and **2**.

**Figure S14** The molecular structures of the complexes **3–5**.

**Figure S15** Sign( $\lambda_2$ ) $\rho$  plot of complex **4b** in the vicinity of Co1···N3.

**Figure S16** Electron localization function plot of complex **4b** in the vicinity of Co1···N3.

**Figure S17** Visualization of  $\pi$ - $\pi$  stacking interactions and hydrogen bonds for complex **1**.

**Figure S18** Visualization of  $\pi$ - $\pi$  stacking interactions for complex **2**.

**Figure S19** Visualization of half of the uncoordinated perchlorate anions substituted by iodide anions including hydrogen bonds distances.

**Figure S20** Visualization of  $\pi$ - $\pi$  stacking interactions for complexes **3–5**.

**Figure S21** The molecules of complex **3** showing supramolecular dimer via hydrogen bonds.

**Figure S22** Supramolecular 3D network formed via hydrogen bonds for complexes **3** and **5**.

**Figure S23** Visualization of  $\pi$ - $\pi$  stacking interactions and hydrogen bonds distances for complex **4b**.

**Figure S24** Magnetic properties of complex **1**.

**Figure S25** Magnetic properties of complex **2**.

**Figure S26** Magnetic properties of complex **3**.

**Figure S27** Magnetic properties of complex **5**.

**Figure S28** Complex **4b**: Field dependence of the out-of-phase component of the ac signal measured at 2 K.

**Figure S29** Complex **4b**: Temperature and field dependence of the in-phase and out-of-phase component of the ac signal under the magnetic field of 3 kOe.

**Table S1** Selected bond angles for complexes **1–5**.

**Table S2** Continuous shape measurement for complexes **1–5**.

**Table S3** Calculated individual non-zero contributions to  $D$ -tensor for studied complexes **1–5** obtained from the CASSCF/NEVPT2 calculations.

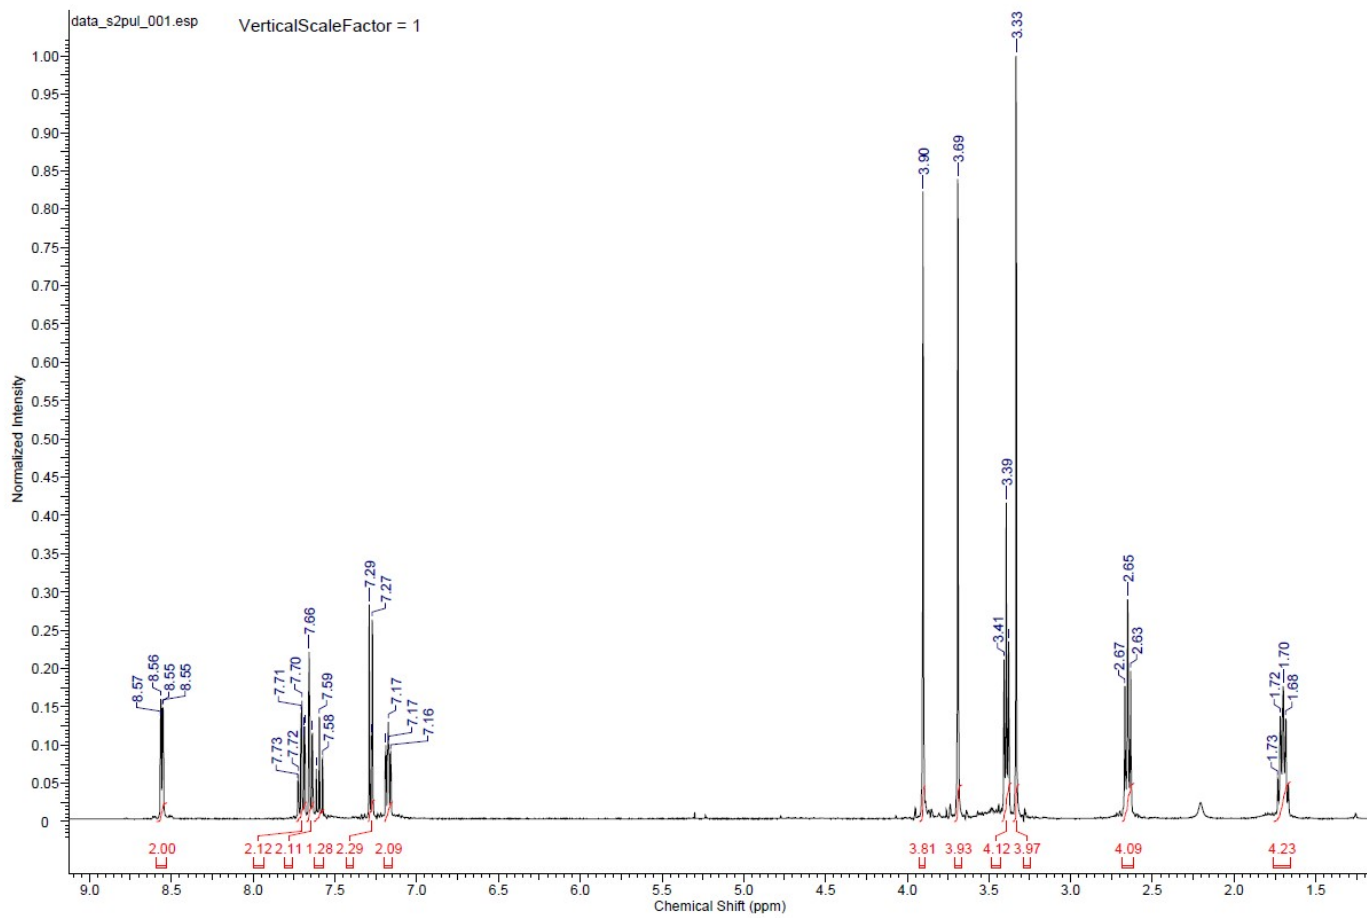

**Figure S1:**  $^1\text{H}$  NMR spectrum (400 MHz,  $\text{CDCl}_3$ ) of **L** (3,14-bis(2-methylpyridine)-3,14,20-triaza-7,10-dioxabicyclo[14.3.1]dodeca-1(20),16,18-triene) with a residual peak of  $\text{CHCl}_3$  at 7.27 ppm ( $^1\text{H}$ ).

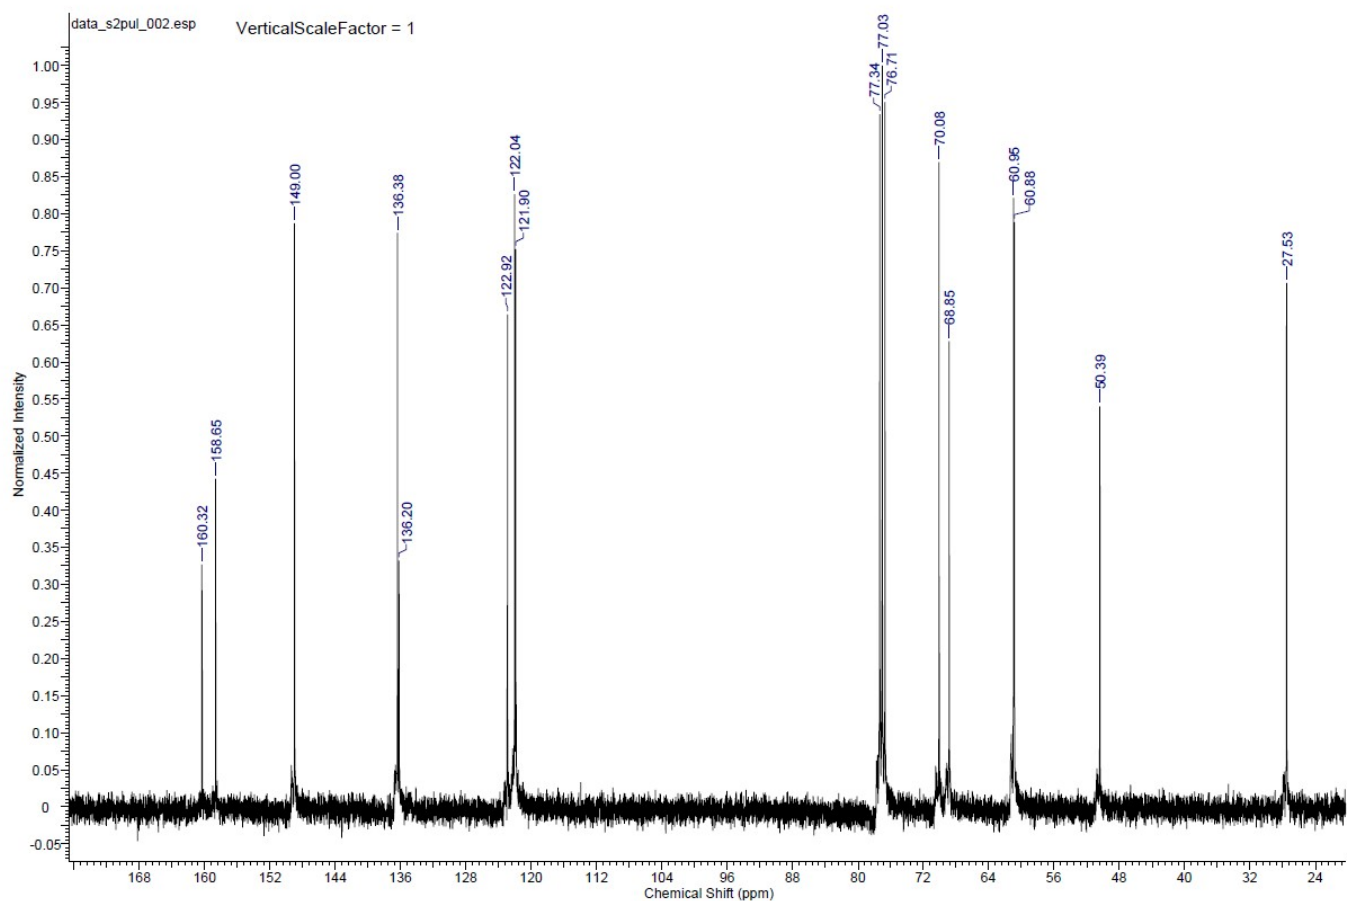

**Figure S2:**  $^{13}\text{C}$  NMR spectrum (400 MHz,  $\text{CDCl}_3$ ) of **L** (3,14-bis(2-methylpyridine)-3,14,20-triaza-7,10-dioxabicyclo[14.3.1]dodeca-1(20),16,18-triene) with a residual peak of  $\text{CHCl}_3$  at 77.0 ppm ( $^{13}\text{C}$ ).

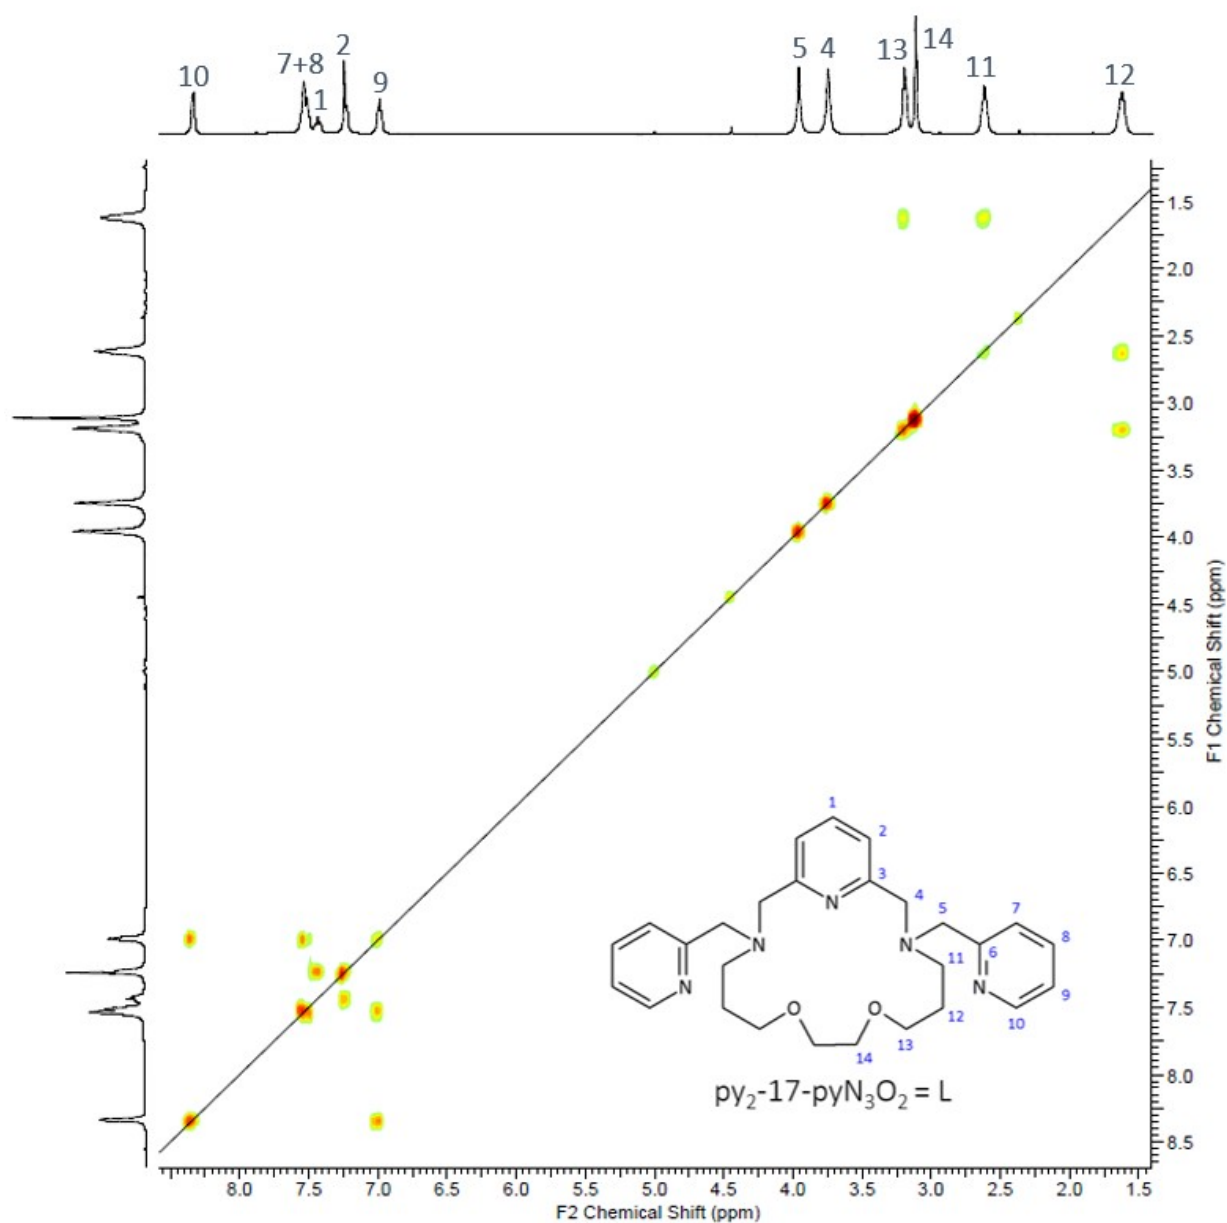

**Figure S3:**  $^1\text{H}$ - $^1\text{H}$  gs-COSY NMR spectrum (400 MHz,  $\text{CDCl}_3$ ) of **L** (3,14-bis(2-methylpyridine)-3,14,20-triaza-7,10-dioxabicyclo[14.3.1]dodeca-1(20),16,18-triene) with a residual peak of  $\text{CHCl}_3$  at 7.27 ppm ( $^1\text{H}$ ).

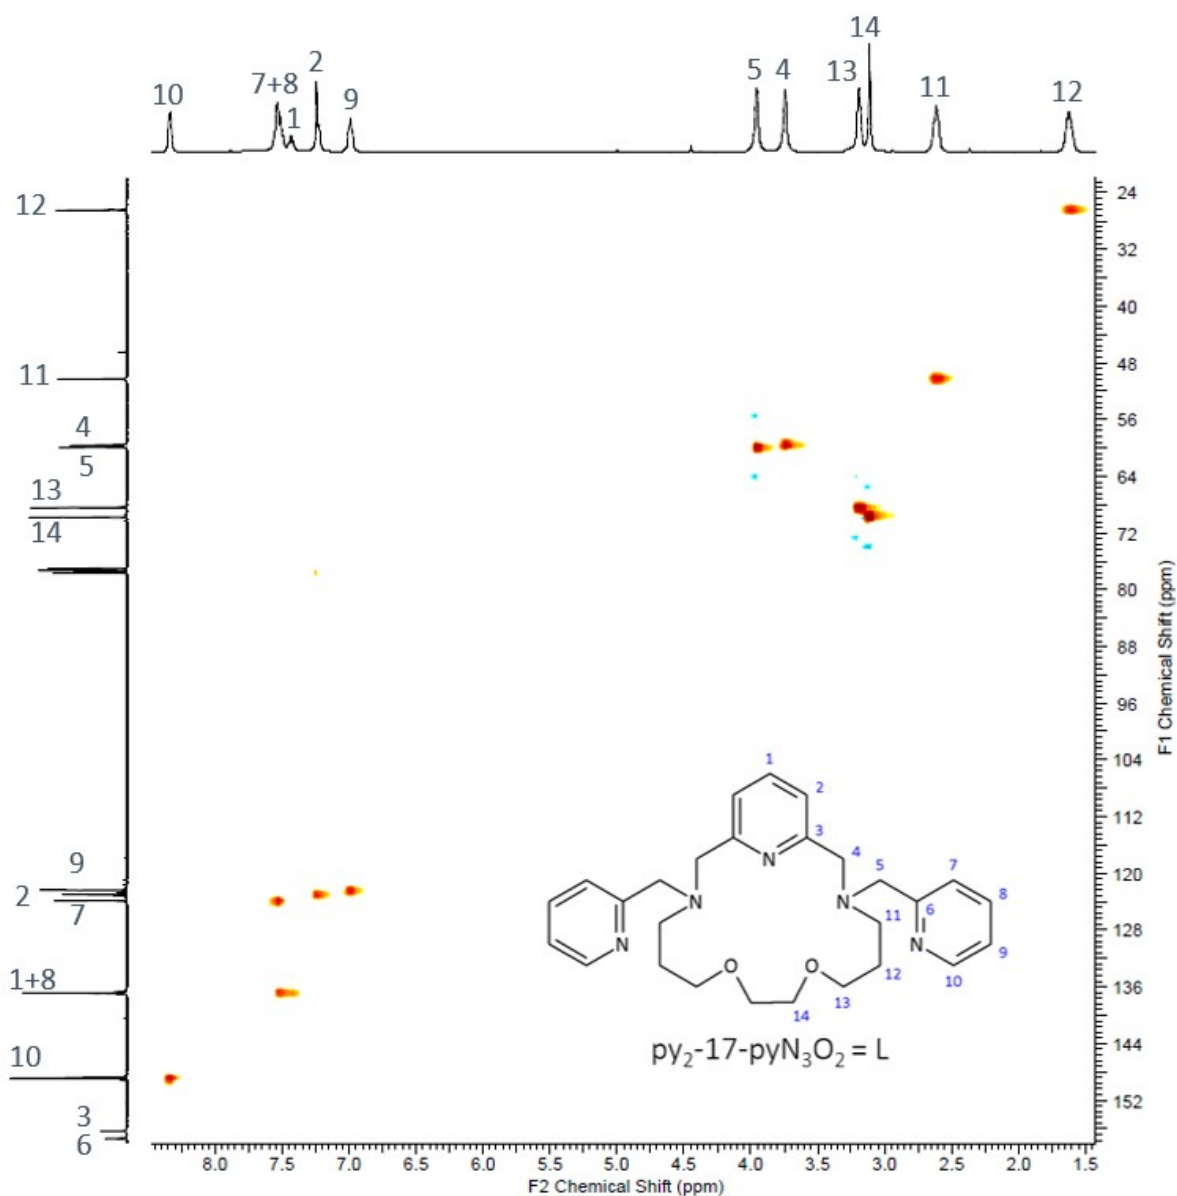

**Figure S4:**  $^1\text{H}$ - $^{13}\text{C}$  *gs*-HMQC NMR spectrum (400 MHz,  $\text{CDCl}_3$ ) of **L** (3,14-bis(2-methylpyridine)-3,14,20-triaza-7,10-dioxabicyclo[14.3.1]dodeca-1(20),16,18-triene) with a residual peak of  $\text{CHCl}_3$  at 7.27 ppm ( $^1\text{H}$ ) and  $\text{CDCl}_3$  at 77.0 ppm ( $^{13}\text{C}$ ).

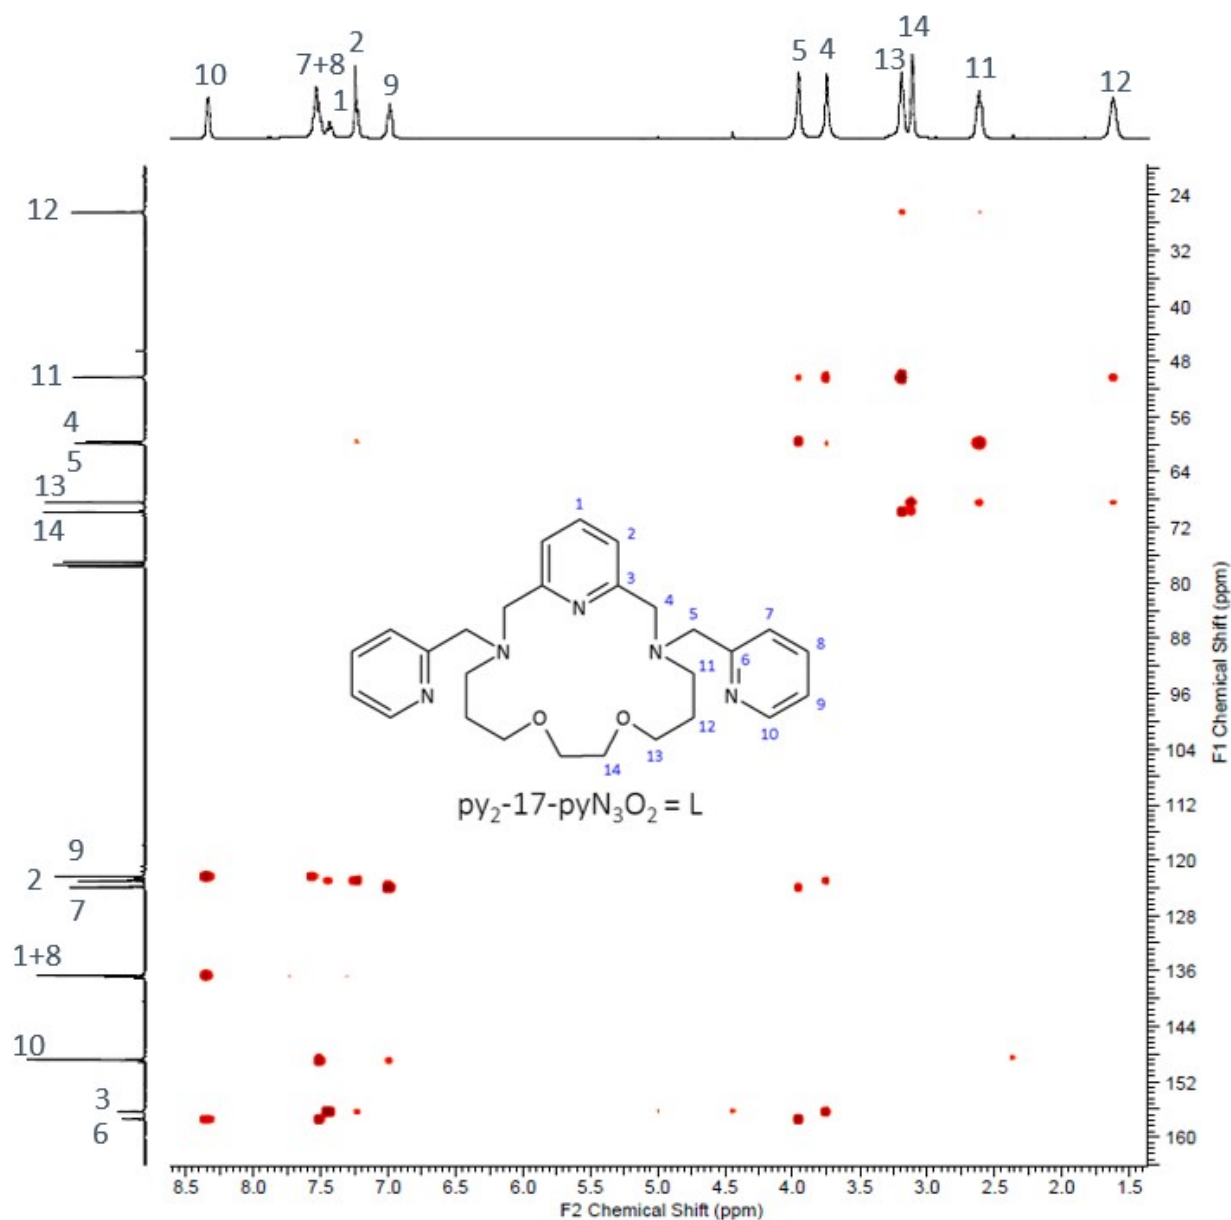

**Figure S5:**  $^1\text{H}$ - $^{13}\text{C}$  *gs*-HMBC NMR spectrum (400 MHz,  $\text{CDCl}_3$ ) of **L** (3,14-bis(2-methylpyridine)-3,14,20-triaza-7,10-dioxabicyclo[14.3.1]dodeca-1(20),16,18-triene) with a residual peak of  $\text{CHCl}_3$  at 7.27 ppm ( $^1\text{H}$ ) and  $\text{CDCl}_3$  at 77.0 ppm ( $^{13}\text{C}$ ).

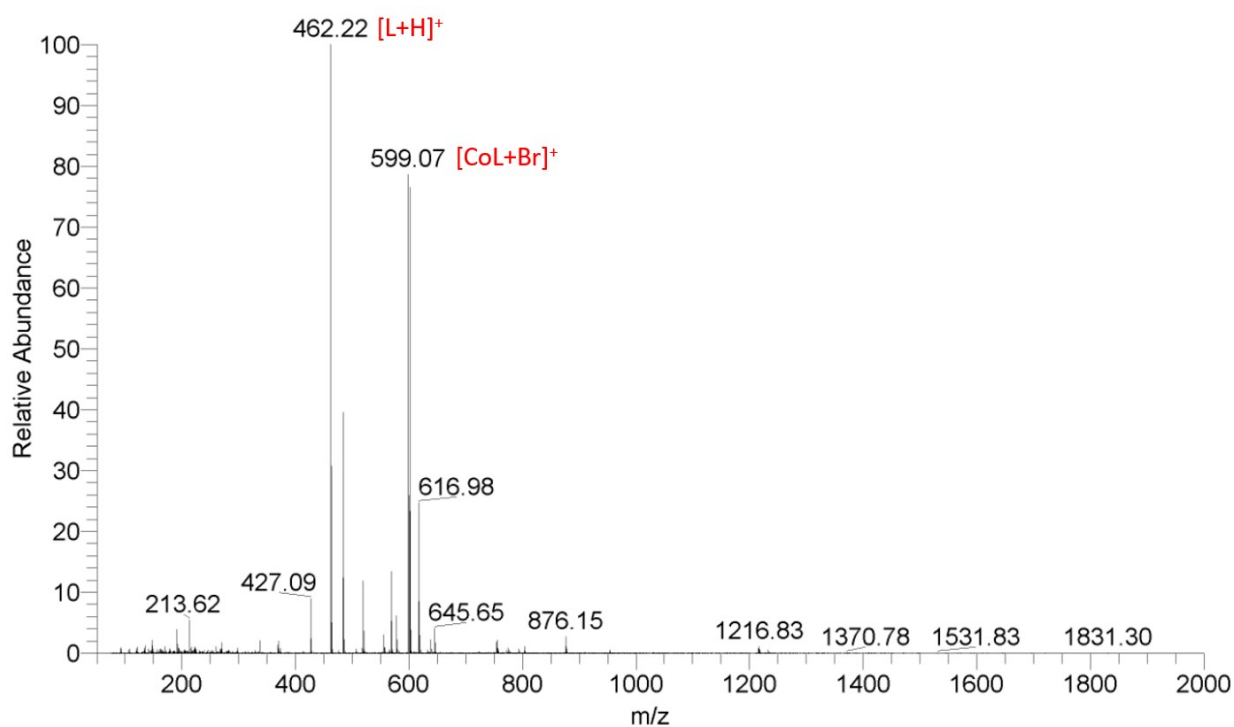

**Figure S6** ESI-MS spectrum of complex 1 in positive mode.

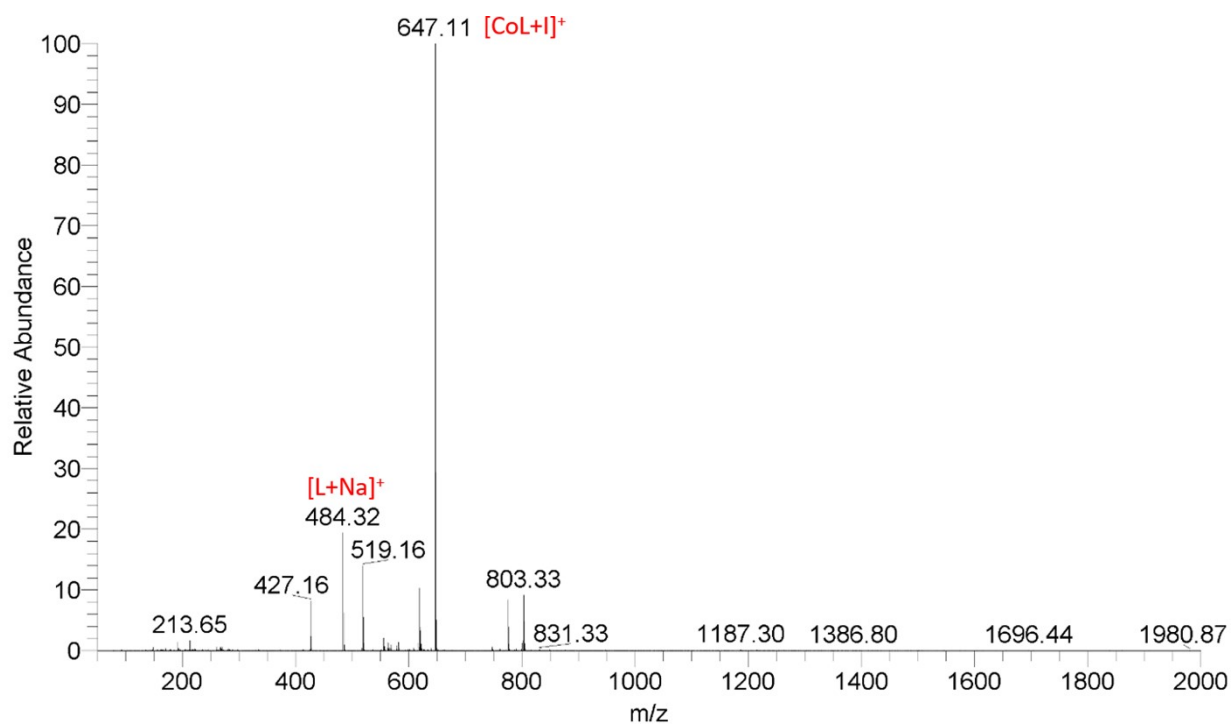

**Figure S7** ESI-MS spectrum of complex 2 in positive mode.



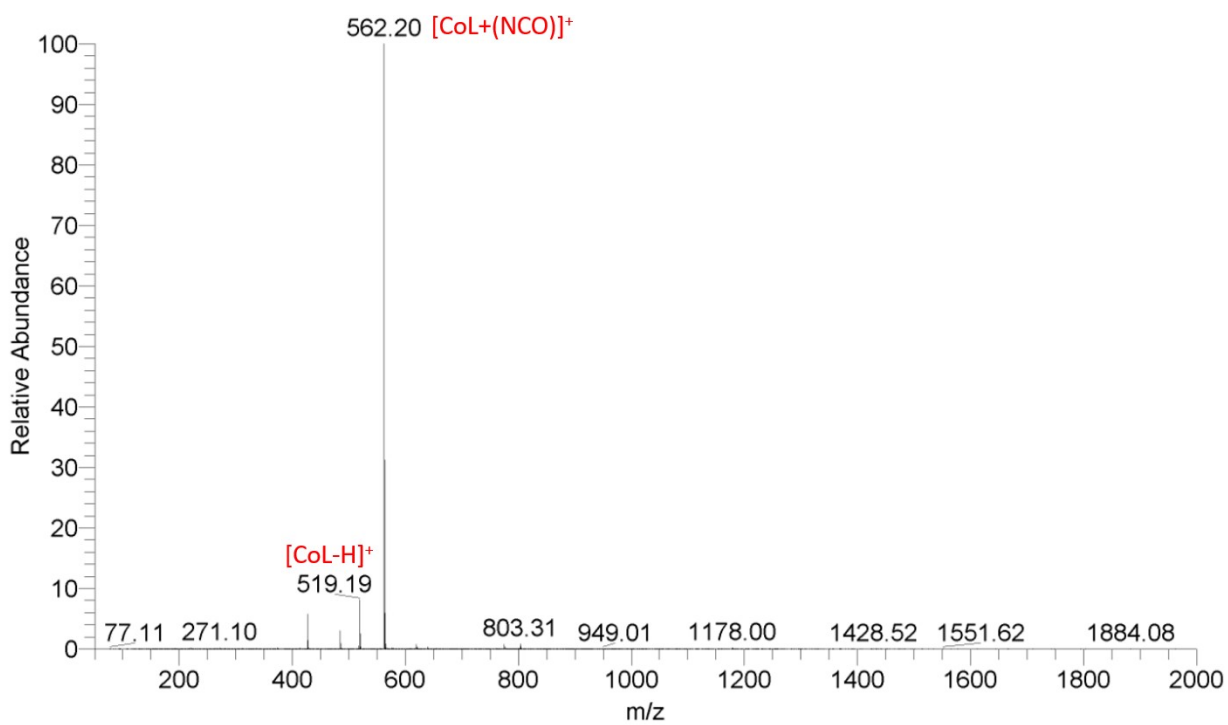

**Figure S8** ESI-MS spectrum of complex **3** in positive mode.

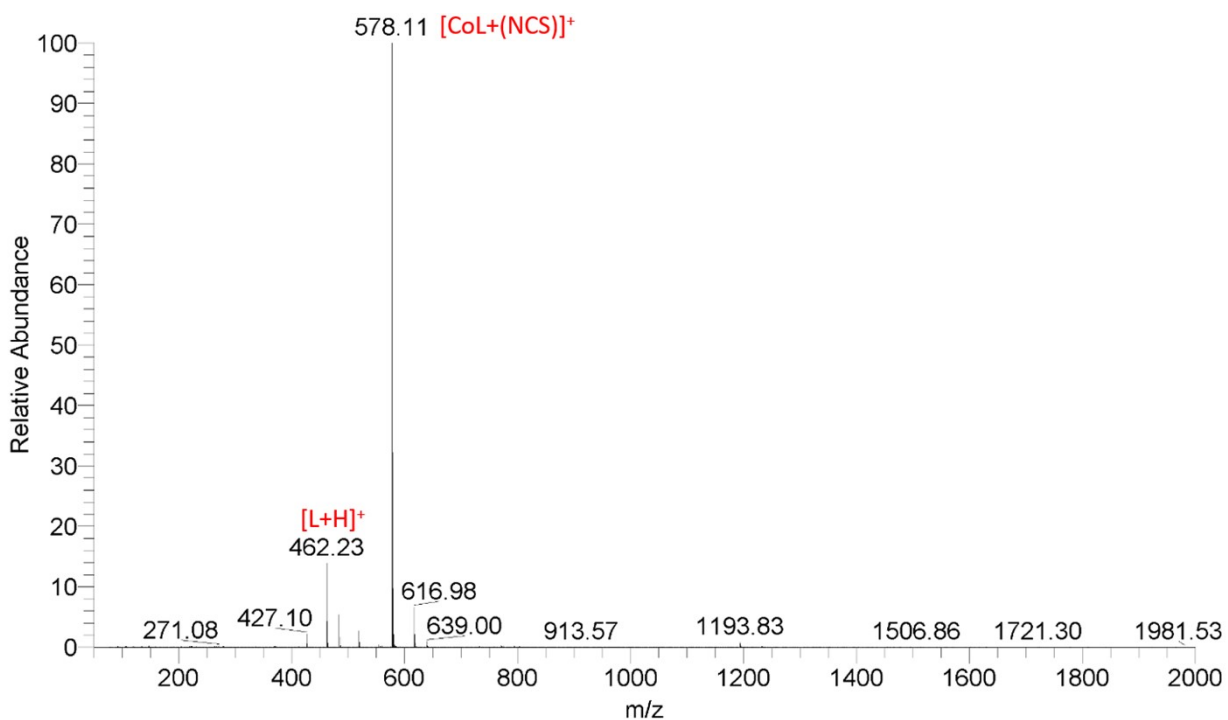

**Figure S9** ESI-MS spectrum of complex **4a** in positive mode.

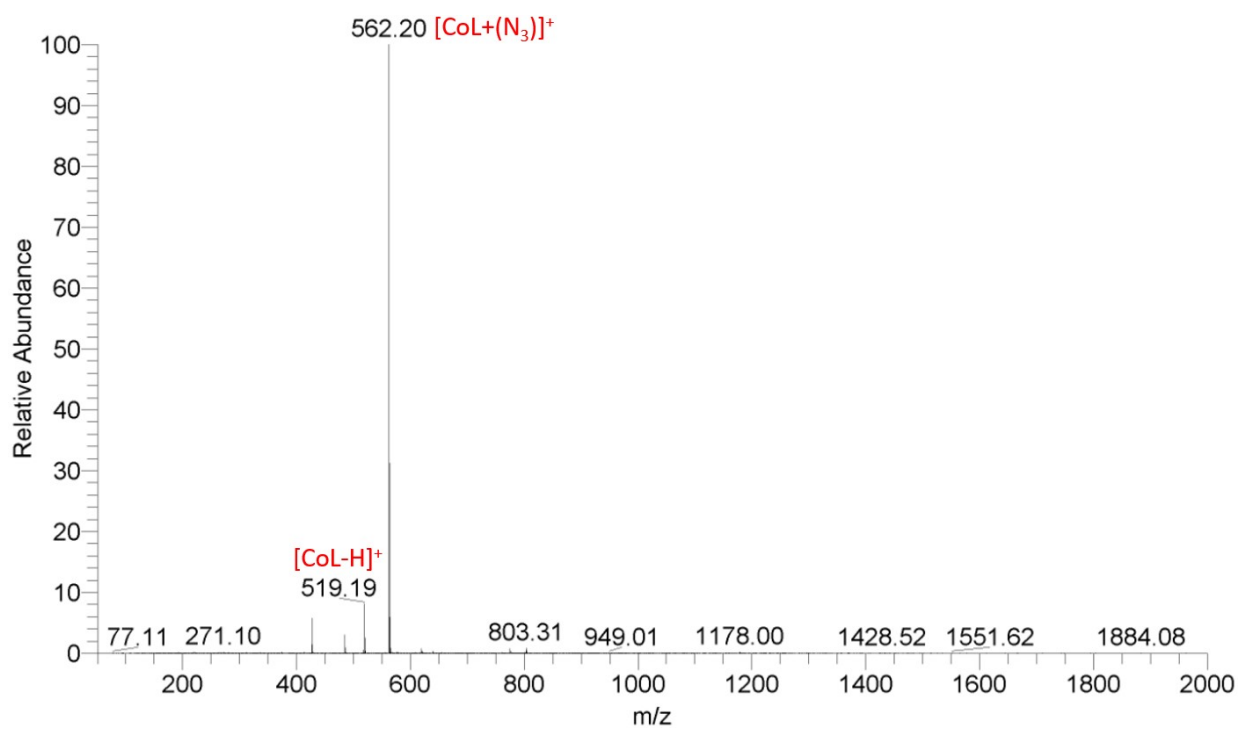

**Figure S10** ESI-MS spectrum of complex **5** in positive mode.

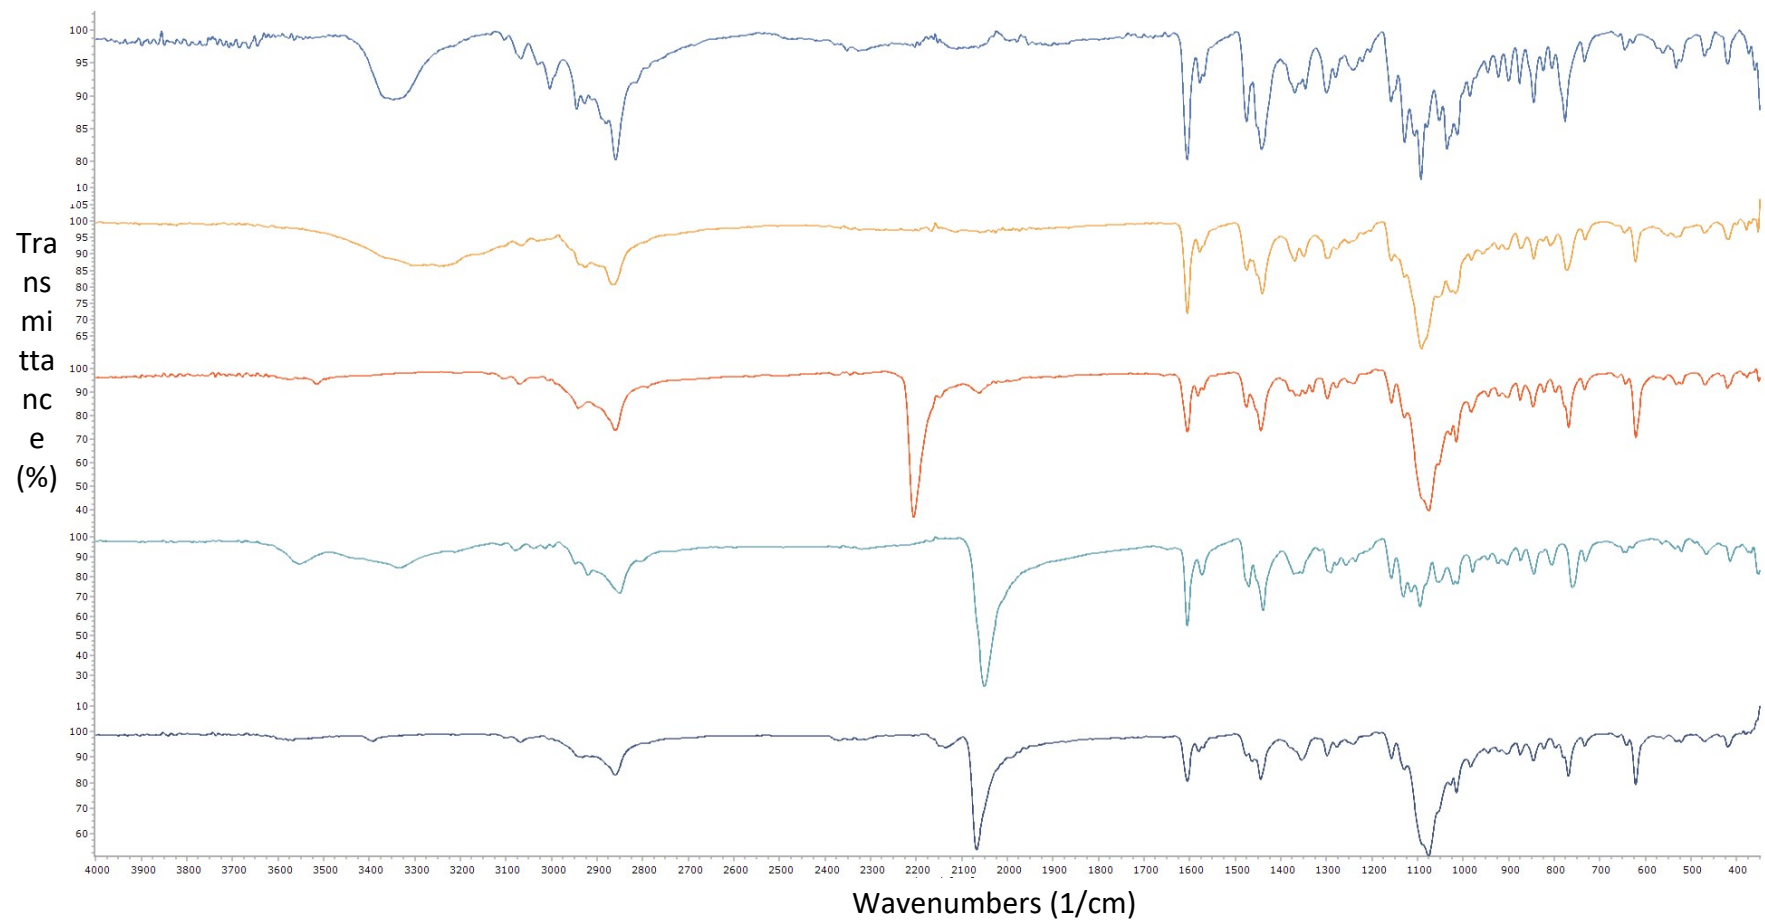

**Figure S11** Comparison of IR spectra of studied complexes **1–5**. Curve colours: blue = **1**; yellow = **2**; red = **3**; green = **4a**; grey = **5**.

Compound 1

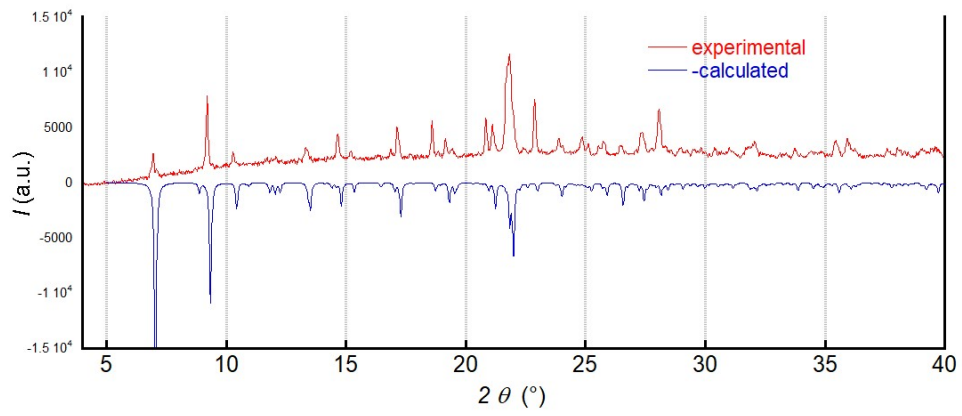

Compound 2

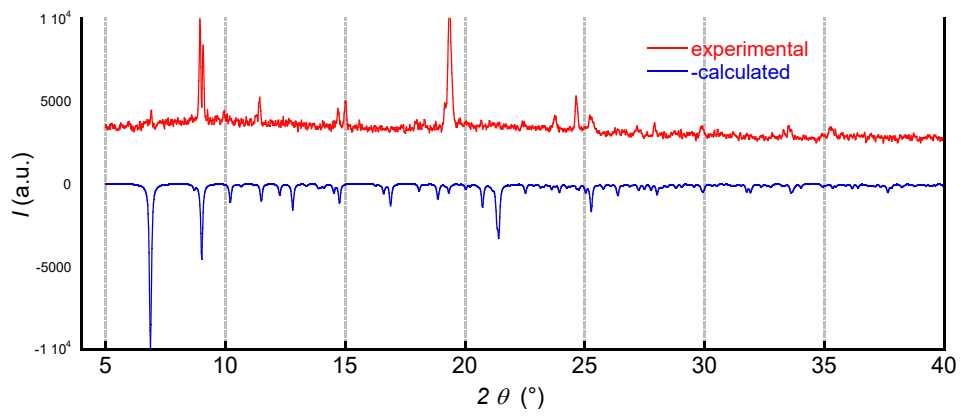

Compound 3

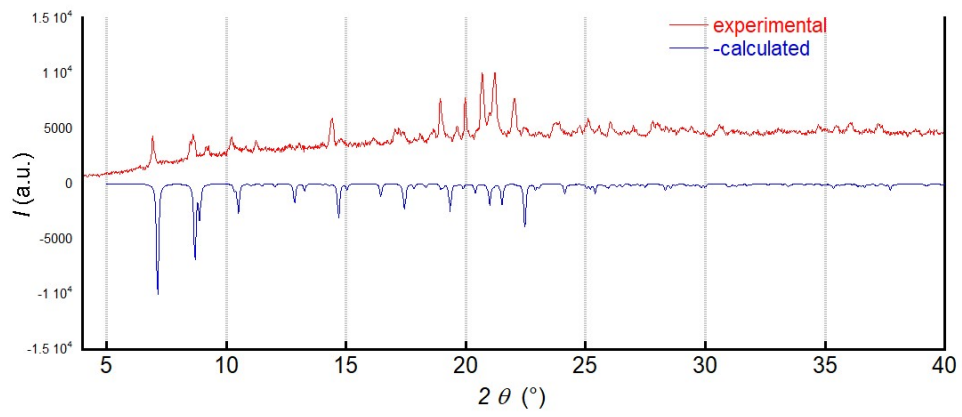

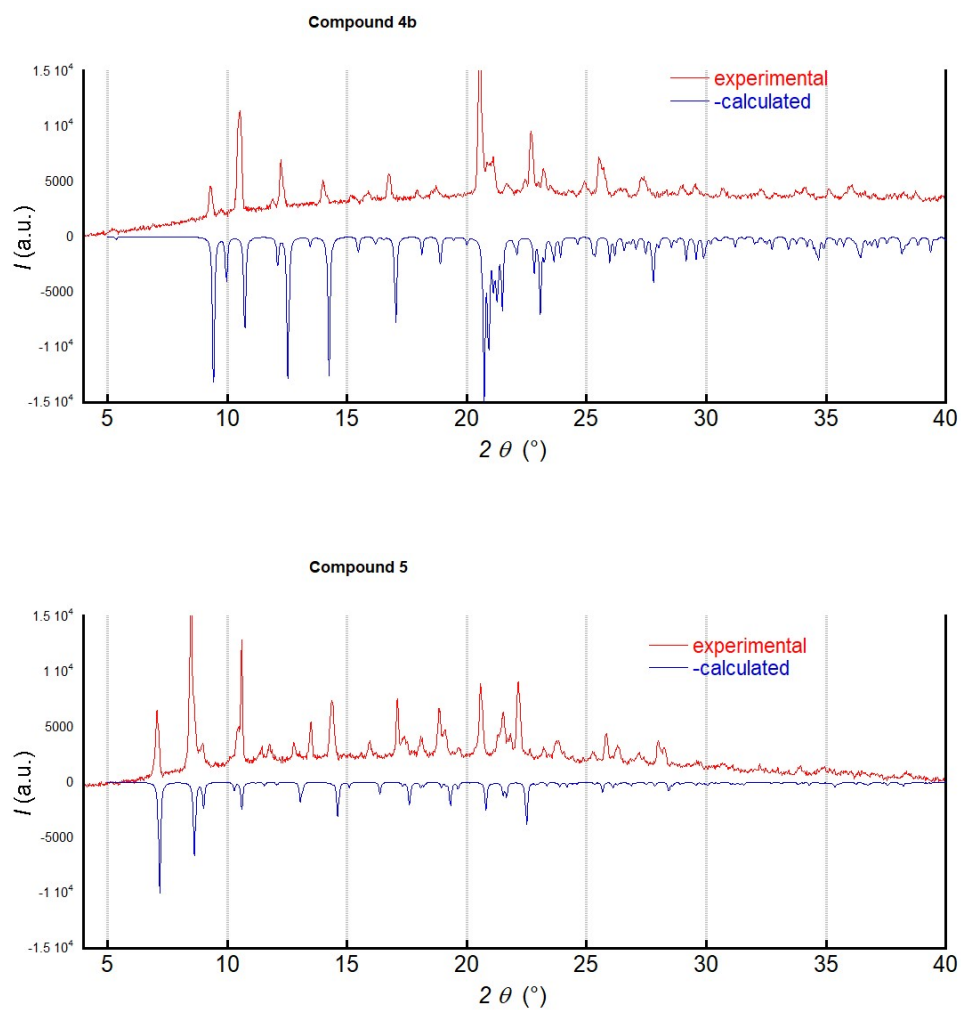

**Figure S12** The X-ray powder diffraction patterns for complexes **1–5** compared to those calculated from single-crystal X-ray analysis.

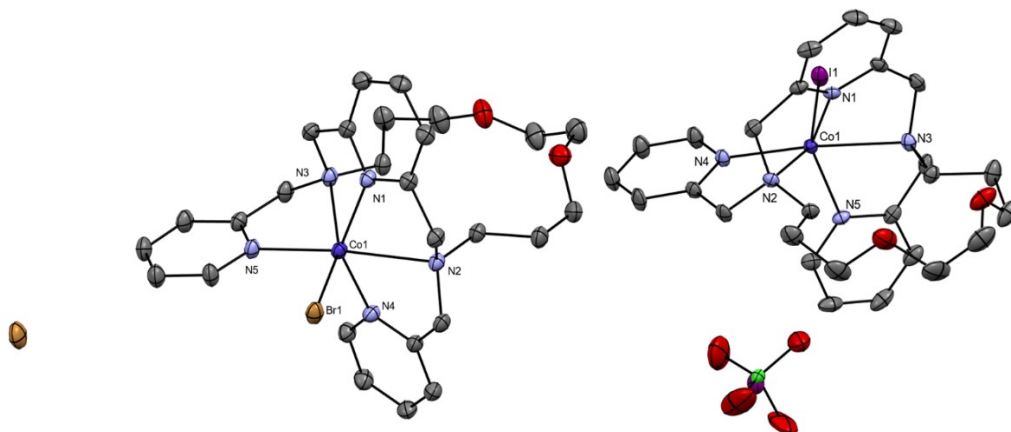

**Figure S13** The molecular structures of the complexes **1** (*left*) and **2** (*right*). Atoms are drawn as thermal ellipsoids at the 15% probability level. Hydrogen atoms were omitted for clarity.

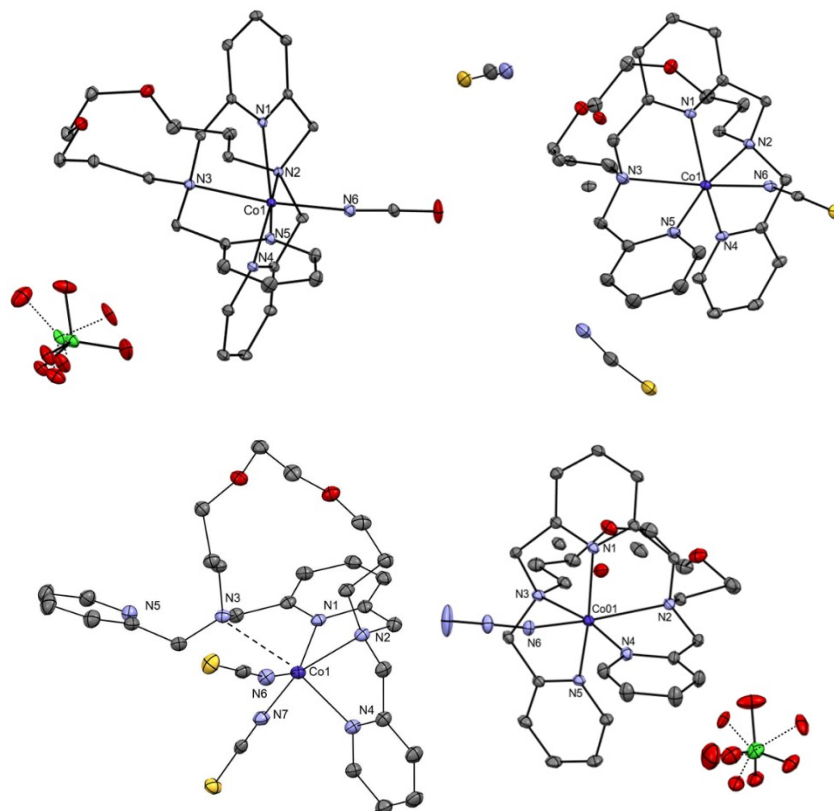

**Figure S14** The molecular structures of the complexes **3**, **4a**, **4b** and **5** (from *left to right* and *top to bottom*). Atoms are drawn as thermal ellipsoids at the 15% probability level. Hydrogen atoms were omitted for clarity.

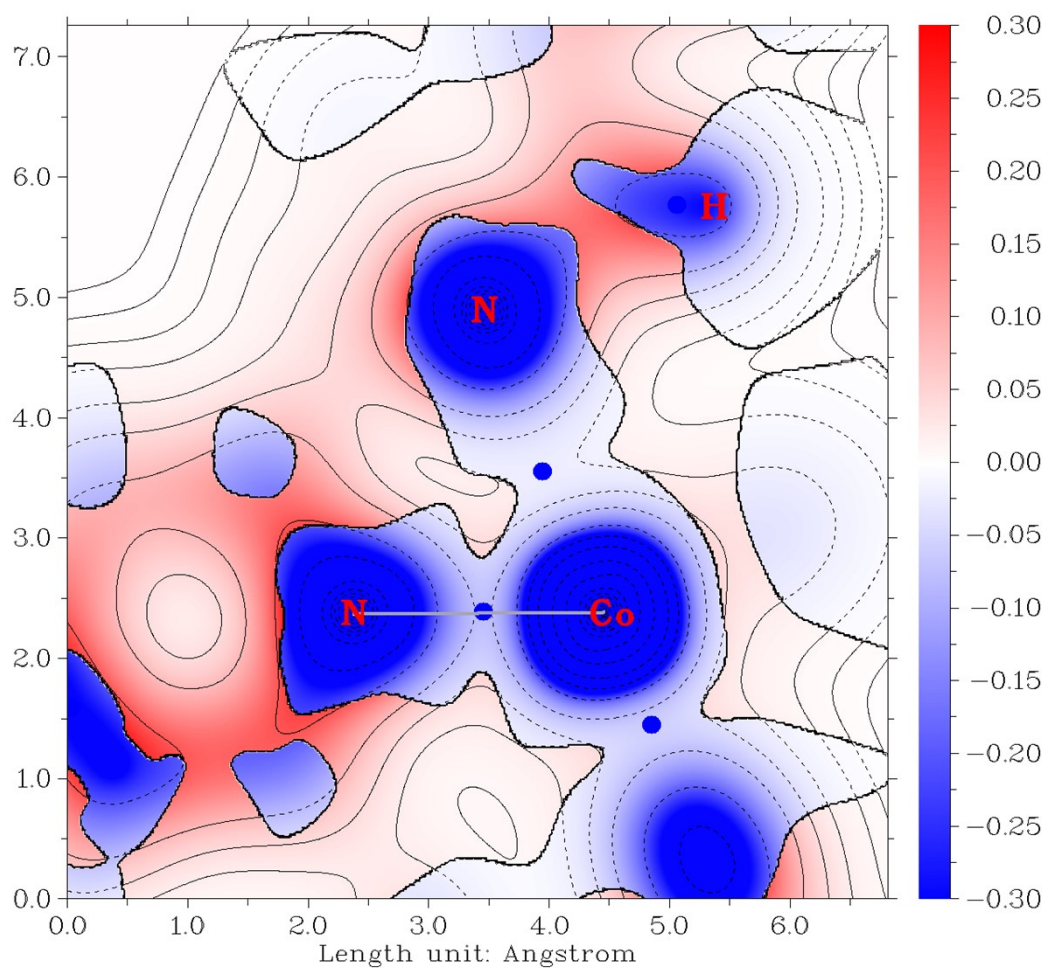

**Figure S15**  $\text{Sign}(\lambda_2)\rho$  plot of complex **4b** in the vicinity of  $\text{Co1}\cdots\text{N3}$ . Bond critical points of type (3,-1) are represented as blue dots.

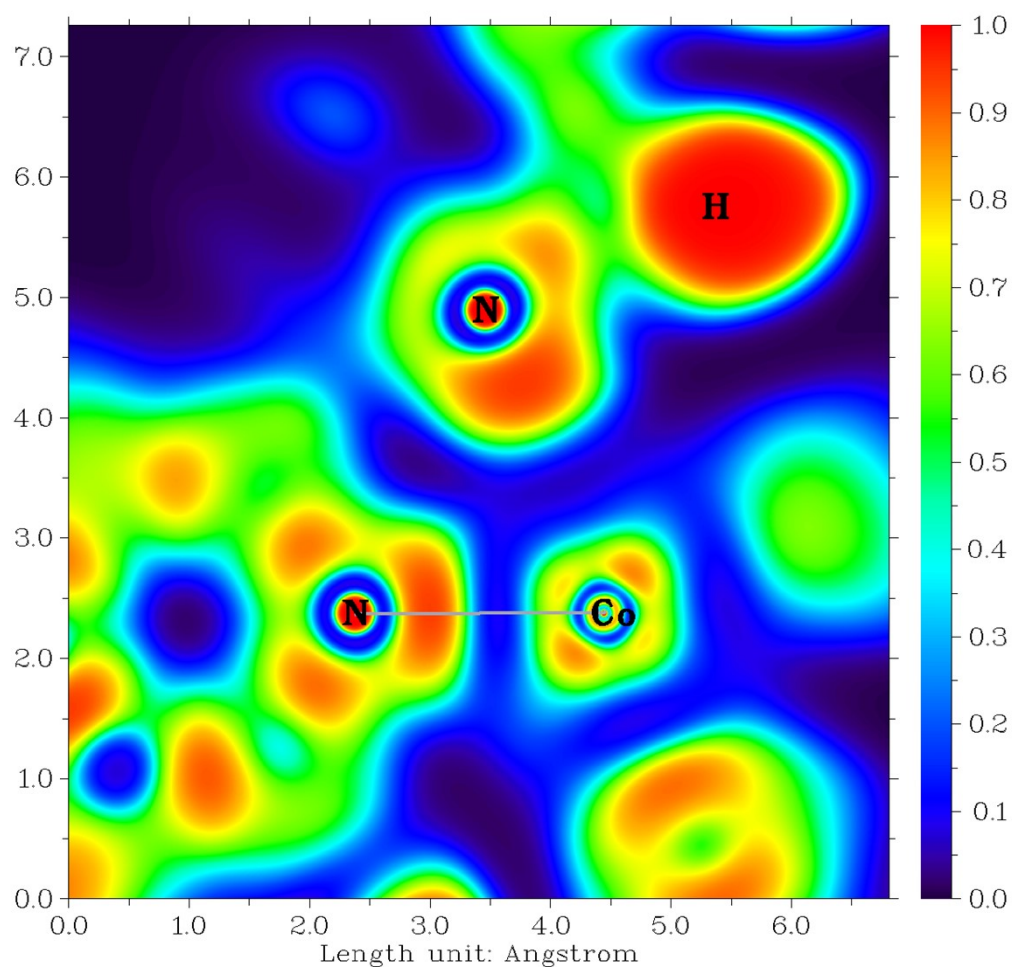

**Figure S16** Electron localization function plot of complex **4b** in the vicinity of Co1···N3.

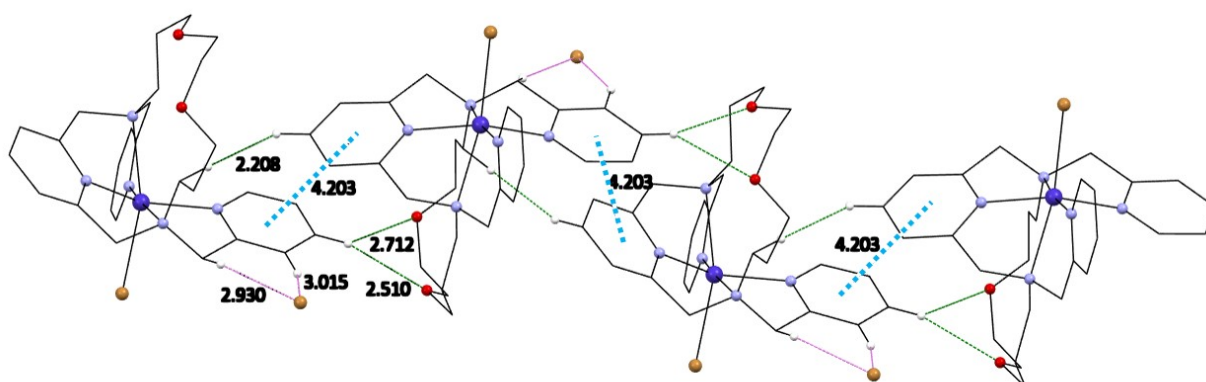

**Figure S17** Visualization of  $\pi$ - $\pi$  stacking interactions with centroids distances (blue dashed lines) between two pyridine rings and hydrogen bonds distances (green lines) for complex **1**.



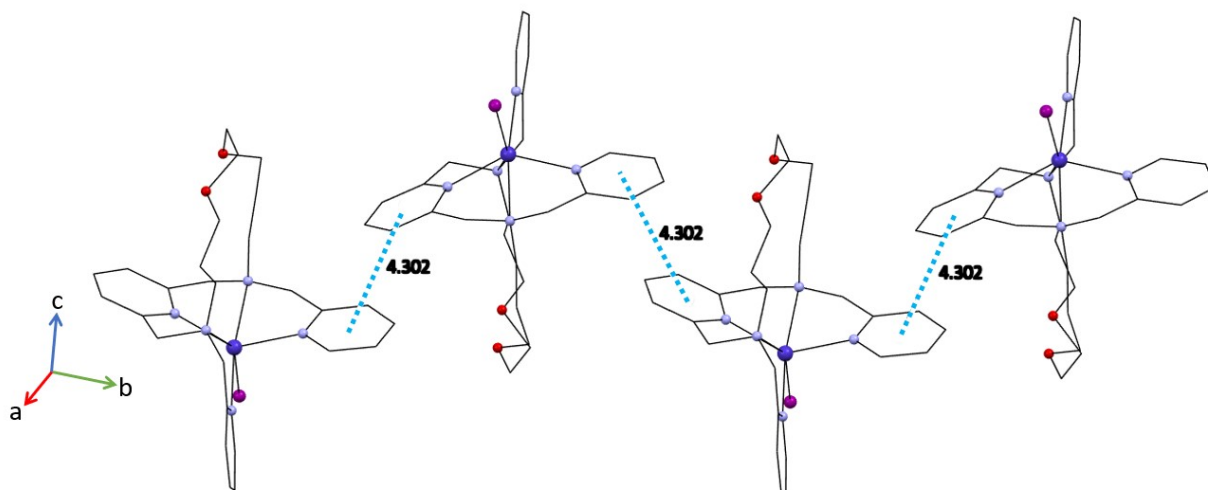

**Figure S18** Visualization of  $\pi$ - $\pi$  stacking interactions with centroids distances (blue dashed lines) between two pyridine rings for complex **2**.

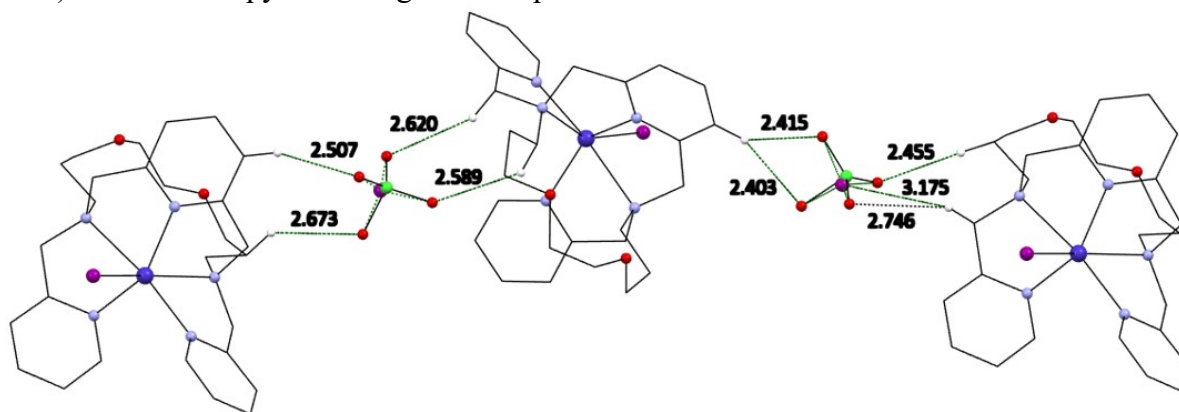

**Figure S19** Visualization of half of the uncoordinated perchlorate anions substituted by iodide anions including hydrogen bonds distances for complex **2**.

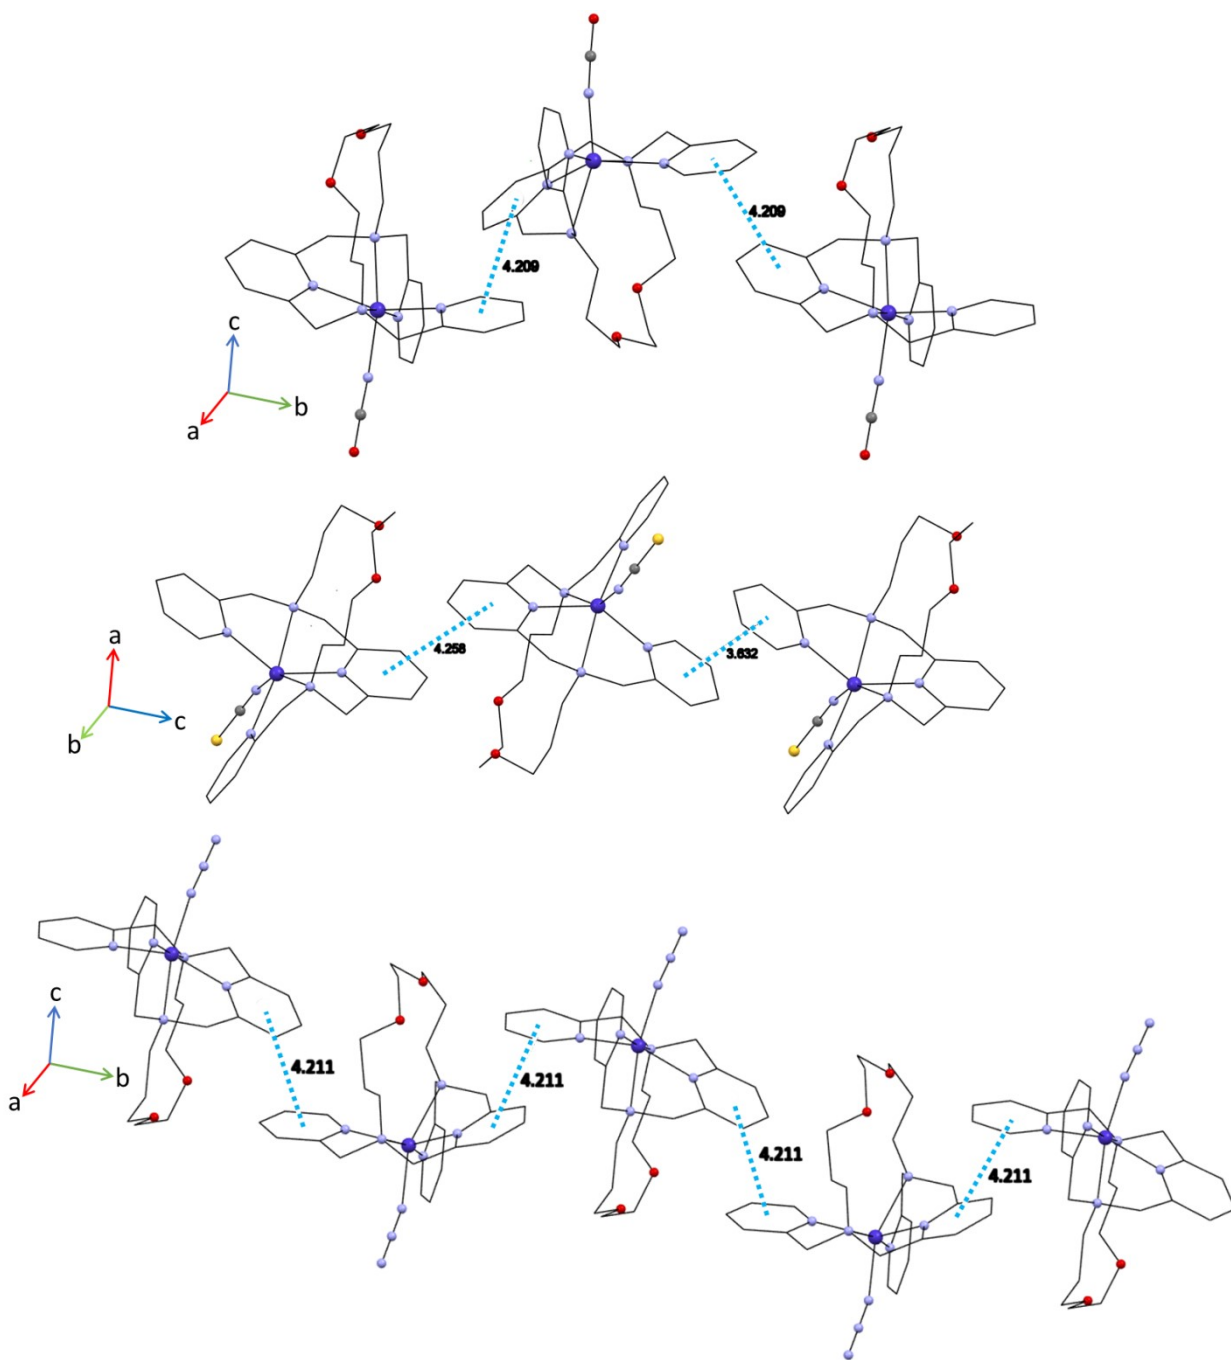

**Figure S20** Visualization of  $\pi$ - $\pi$  stacking interactions with centroids distances (blue dashed lines) between two pyridine rings for complexes **3–5** from top to bottom.

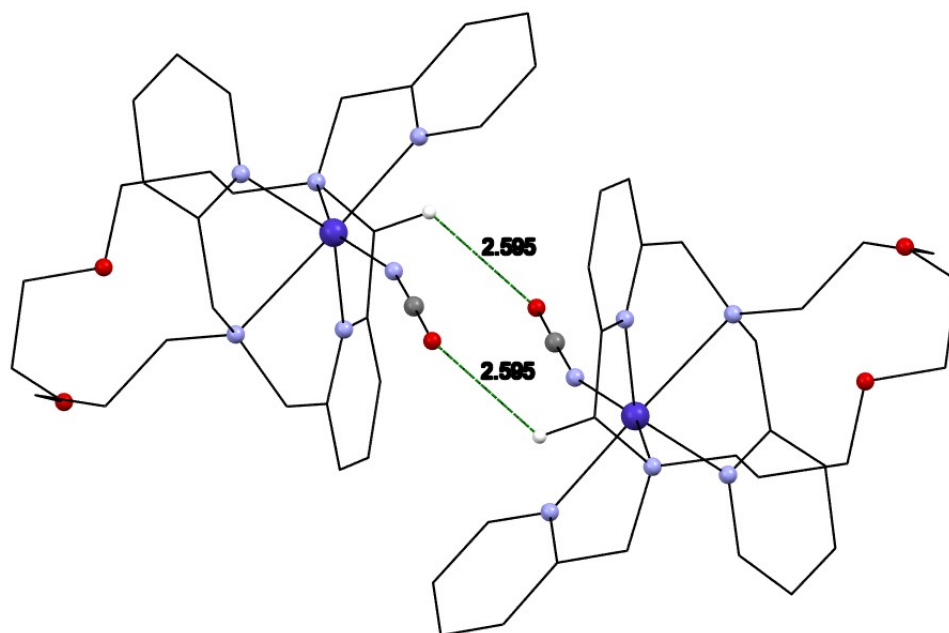

**Figure S21** The molecules of complex **3** oriented in antiparallel directions and formation of supramolecular dimer via hydrogen bonds between the NCO<sup>-</sup> aliphatic -CH<sub>2</sub>- groups bearing pyridine rings with displayed bond distances.

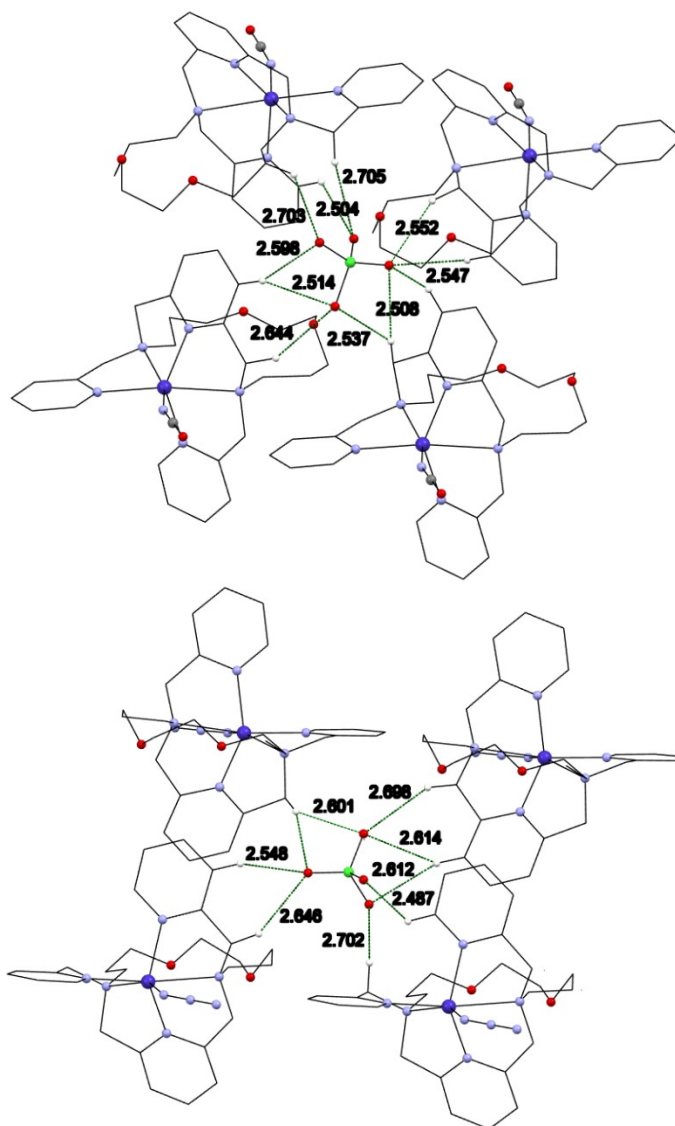

**Figure S22** Supramolecular 3D network formed via  $C_{\text{aryl}}-H \cdots O-Cl-O \cdots H-C_{\text{aryl}}$  hydrogen bonds for complexes **3** (top) and **5** (bottom).

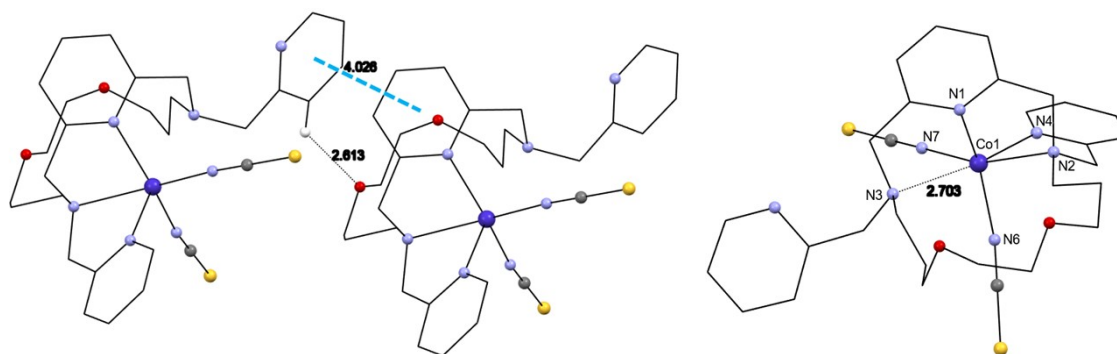

**Figure S23** Visualization of  $\pi-\pi$  stacking interactions with centroids distances (blue dashed lines) between two pyridine rings and hydrogen bonds distances (green lines) for complex **4b**.

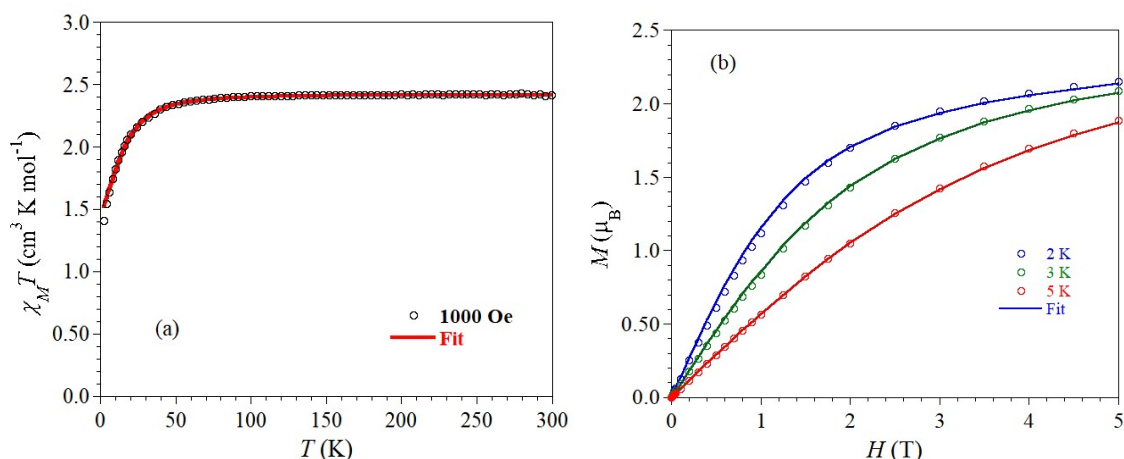

**Figure S24 Complex 1:** (a) Temperature dependence of  $\chi_M T$  at 1000 Oe and (b) field dependence of magnetization at 2, 3 and 5 K under magnetic fields up to 5 T. The lines materialize the best fit (see text).

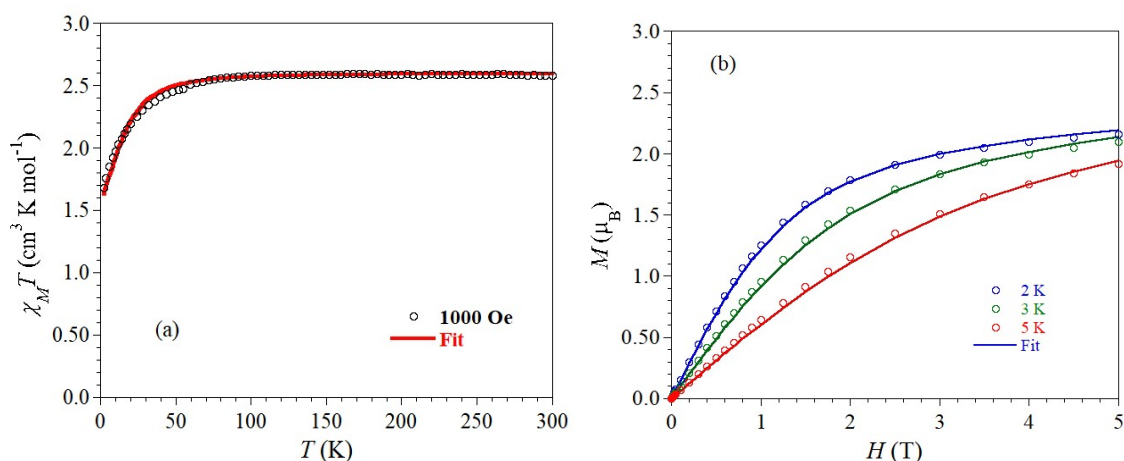

**Figure S25 Complex 2:** (a) Temperature dependence of  $\chi_M T$  at 1000 Oe and (b) field dependence of magnetization at 2, 3 and 5 K under magnetic fields up to 5 T. The lines materialize the best fit (see text).

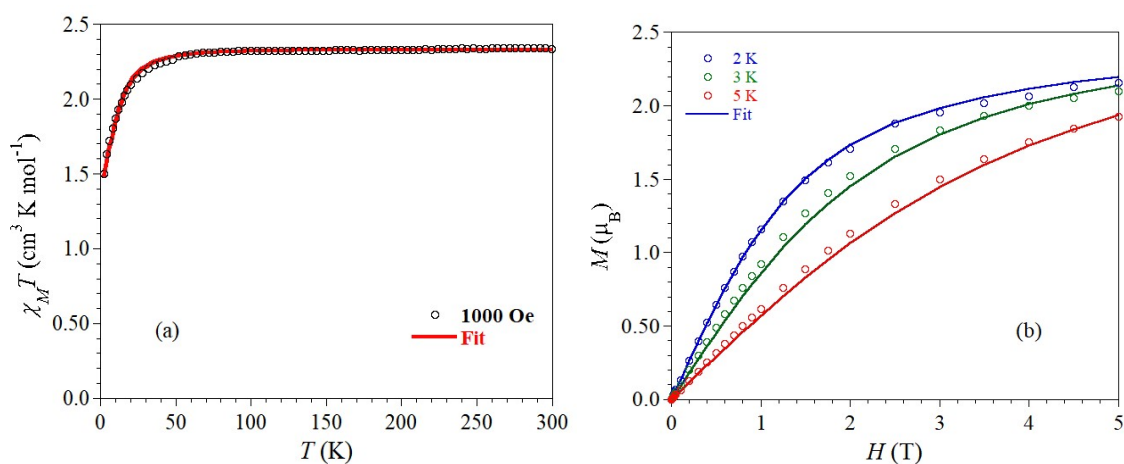

**Figure S26 Complex 3:** (a) Temperature dependence of  $\chi_M T$  at 1000 Oe and (b) field dependence of magnetization at 2, 3 and 5 K under magnetic fields up to 5 T. The lines materialize the best fit (see text).

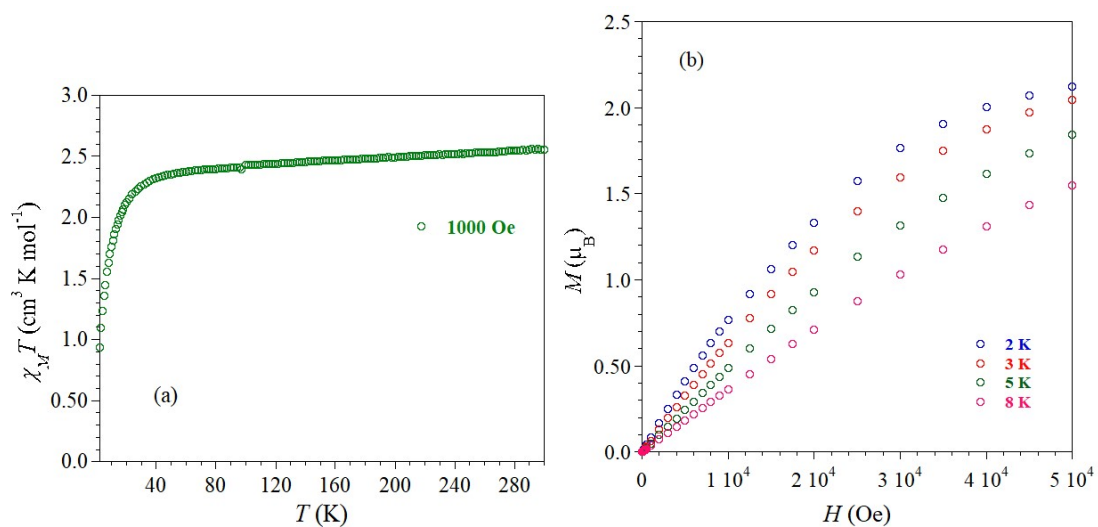

**Figure S27 Complex 5:** (a) Temperature dependence of  $\chi_M T$  at 1000 Oe and (b) field dependence of magnetization at 2, 3 and 5 K under magnetic fields up to 5 T.

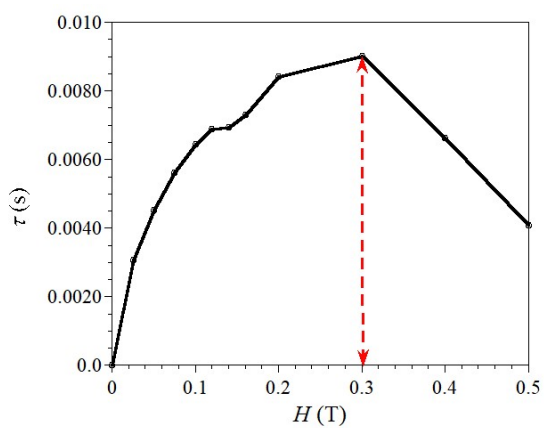

**Figure S28 Complex 4b:** Field dependence of the out-of-phase component of the ac signal measured at 2 K.

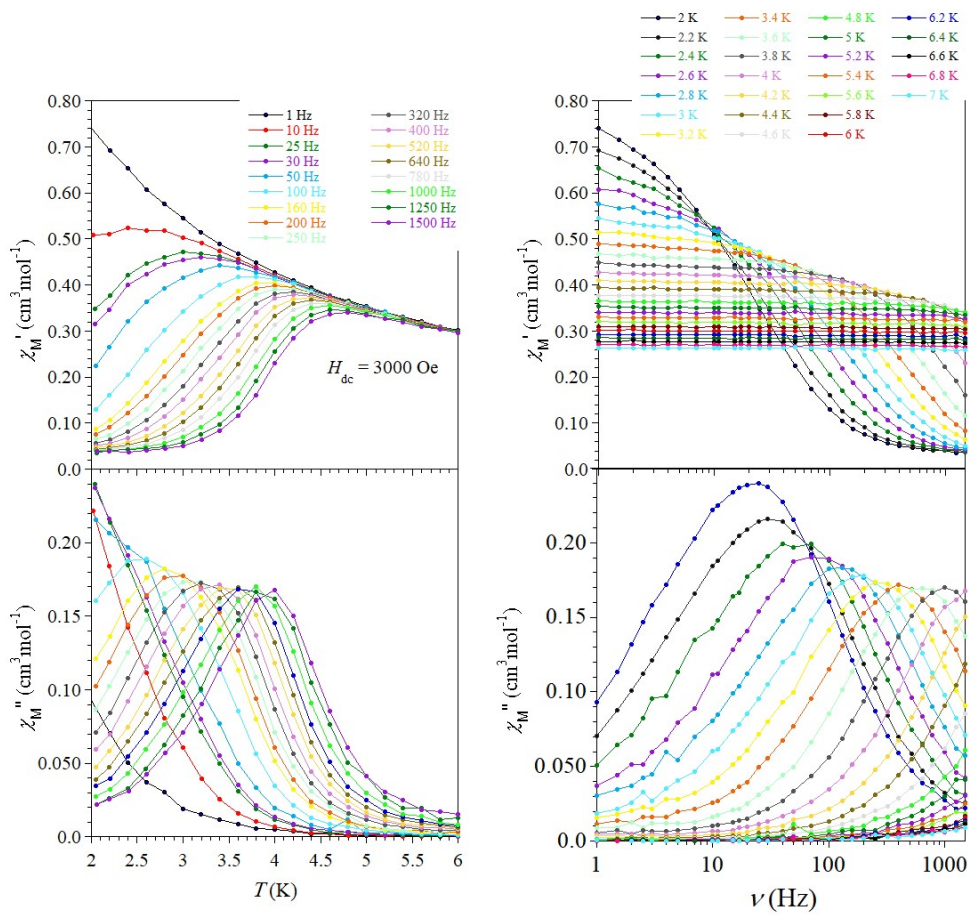

**Figure S29** Complex **4b**: Temperature and field dependence of the in-phase and out-of-phase component of the ac signal under a dc magnetic field of 3 kOe.

**Table S1** Selected bond angles for complexes **1–5**, where X stands for Br (**1**), I (**2**), NCO (**3**), NCS (**4a**) and N<sub>3</sub> (**5**) respectively. The three largest values are given in red color.

| Complex   | <b>1</b>  | <b>2</b>  | <b>3</b> | <b>4a</b> | <b>5</b> |           | <b>4b</b> |
|-----------|-----------|-----------|----------|-----------|----------|-----------|-----------|
| Atoms     | Angle (°) |           |          |           |          | Atoms     |           |
| N1–Co1–N2 | 70.1(1)   | 73.0(1)   | 70.0(1)  | 72.1(1)   | 74.1(1)  | N1–Co1–N2 | 74.58(6)  |
| N1–Co1–N3 | 73.0(1)   | 70.6(1)   | 73.8(1)  | 73.3(1)   | 70.6(1)  | N1–Co1–N4 | 112.35(6) |
| N1–Co1–N4 | 137.6(1)  | 117.4(2)  | 136.8(1) | 140.0(1)  | 118.4(1) | N2–Co1–N4 | 73.81(6)  |
| N1–Co1–N5 | 116.0(1)  | 138.9(1)  | 116.8(1) | 116.0(1)  | 137.8(1) | N1–Co1–N6 | 138.80(7) |
| N2–Co1–N3 | 110.4(1)  | 111.5(1)  | 113.1(1) | 114.9(1)  | 114.0(1) | N2–Co1–N6 | 89.92(6)  |
| N2–Co1–N4 | 73.5(1)   | 72.7(1)   | 73.3(1)  | 74.1(1)   | 73.0(1)  | N4–Co1–N6 | 98.87(7)  |
| N2–Co1–N5 | 173.9(1)  | 103.3(1)  | 172.6(1) | 171.1(1)  | 101.6(1) | N1–Co1–N7 | 100.97(6) |
| N3–Co1–N4 | 100.6(1)  | 172.0(2)  | 101.3(1) | 102.9(1)  | 170.5(1) | N2–Co1–N7 | 158.75(6) |
| N3–Co1–N5 | 72.2(1)   | 73.3(1)   | 72.8(1)  | 72.3(1)   | 73.6(1)  | N4–Co1–N7 | 89.36(7)  |
| N4–Co1–N5 | 100.6(2)  | 99.3(2)   | 101.5(1) | 99.5(1)   | 99.2(1)  | N6–Co1–N7 | 105.73(7) |
| X–Co1–N1  | 102.5(1)  | 100.4(1)  | 101.8(1) | 99.0(1)   | 102.2(1) | N3–Co1–N6 | 85.81(6)  |
| X–Co1–N2  | 87.32(9)  | 155.41(9) | 85.4(1)  | 84.7(1)   | 153.4(1) | N3–Co1–N7 | 79.75(6)  |
| X–Co1–N3  | 158.0(1)  | 87.4(1)   | 157.0(1) | 154.2(1)  | 88.4(1)  | N3–Co1–N1 | 68.64(5)  |
| X–Co1–N4  | 96.9(1)   | 90.7(1)   | 97.0(1)  | 98.6(1)   | 86.6(1)  | N3–Co1–N2 | 116.37(5) |
| X–Co1–N5  | 91.6(1)   | 97.1(1)   | 90.1(1)  | 90.2(1)   | 98.3(1)  | N3–Co1–N4 | 168.98(6) |



**Table S2** Continuous shape measurement for complexes **1–5**. (HP-6 = Hexagon; PPY-6 = Pentagonal pyramid; OC-6 = Octahedron; TPR-6 = Trigonal prism; JPPY-6 = Johnson pentagonal pyramid). The smallest deviation from the optimal shape is highlighted in blue filling.

| Complex | <b>1</b> | <b>2</b> | <b>3</b> | <b>4a</b> | <b>4b</b> | <b>5</b> |
|---------|----------|----------|----------|-----------|-----------|----------|
| HP-6    | 28.413   | 29.006   | 27.748   | 27.646    | 27.723    | 28.324   |
| PPY-6   | 13.981   | 14.498   | 13.457   | 13.868    | 12.418    | 13.338   |
| OC-6    | 6.734    | 7.389    | 7.003    | 6.934     | 7.219     | 7.316    |
| TPR-6   | 8.748    | 8.829    | 7.724    | 7.141     | 7.366     | 7.151    |
| JPPY-6  | 16.749   | 17.219   | 16.611   | 17.090    | 15.360    | 16.498   |

**Table S3** Calculated individual non-zero contributions to *D*-tensor for studied complexes **1–5** obtained from the CASSCF/NEVPT2 calculations.

**Complex 1 (Br<sup>-</sup>)**

| Multiplicity | Root | D       | E      |
|--------------|------|---------|--------|
| 4            | 1    | -19.732 | -3.506 |
| 4            | 2    | -1.355  | -6.786 |
| 4            | 3    | -2.918  | -0.883 |
| 4            | 4    | 6.571   | 5.749  |
| 4            | 5    | 0.167   | -0.008 |
| 4            | 6    | 0.019   | -0.024 |
| 4            | 7    | 0.01    | -0.015 |
| 4            | 8    | -0.021  | 0      |
| 4            | 9    | 0.001   | -0.002 |
| 2            | 0    | -0.416  | 1.16   |
| 2            | 1    | -0.688  | -0.665 |
| 2            | 2    | 0       | -0.003 |
| 2            | 3    | 0.196   | -0.019 |
| 2            | 4    | 0.023   | -0.003 |
| 2            | 5    | 0.068   | -0.001 |
| 2            | 6    | 2.205   | 0.378  |
| 2            | 7    | -0.658  | 1.273  |
| 2            | 8    | -2.207  | -2.147 |
| 2            | 9    | 0.397   | 0.21   |
| 2            | 10   | 0.195   | 0.024  |
| 2            | 11   | -0.029  | 0.026  |
| 2            | 12   | 0.025   | 0.026  |
| 2            | 13   | 0.045   | 0.239  |
| 2            | 14   | -0.061  | -0.036 |
| 2            | 15   | 0.203   | 0.051  |
| 2            | 16   | -0.181  | 0.187  |
| 2            | 17   | 0.088   | -0.013 |
| 2            | 18   | -0.096  | -0.095 |
| 2            | 19   | -0.057  | 0.015  |
| 2            | 20   | -0.319  | -0.344 |
| 2            | 21   | -0.339  | -0.408 |
| 2            | 22   | -0.048  | -0.051 |
| 2            | 23   | -0.387  | 0.384  |
| 2            | 24   | 0.073   | 0.035  |
| 2            | 25   | 0.456   | 0.016  |
| 2            | 26   | 0.004   | -0.001 |
| 2            | 27   | -0.014  | -0.007 |
| 2            | 28   | -0.004  | 0.003  |
| 2            | 29   | 0.121   | -0.035 |

|   |    |        |        |
|---|----|--------|--------|
| 2 | 30 | -0.099 | 0.096  |
| 2 | 31 | 0.072  | -0.065 |
| 2 | 32 | -0.008 | 0.006  |
| 2 | 33 | 0.007  | 0.01   |
| 2 | 34 | 0.001  | 0      |
| 2 | 35 | -0.001 | 0.005  |
| 2 | 36 | 0      | -0.008 |
| 2 | 37 | -0.004 | -0.002 |
| 2 | 38 | -0.008 | -0.006 |
| 2 | 39 | -0.017 | 0.013  |

### Complex 2 (I)

| Multiplicity | Root | D      | E      |
|--------------|------|--------|--------|
| 4            | 1    | -30.42 | -1.375 |
| 4            | 2    | 3.372  | -7.428 |
| 4            | 3    | -1.295 | -1.253 |
| 4            | 4    | 4.251  | 4.326  |
| 4            | 5    | 0.68   | 0.074  |
| 4            | 6    | 0.017  | -0.014 |
| 4            | 7    | 0.006  | -0.007 |
| 4            | 8    | -0.013 | 0      |
| 4            | 9    | -0.005 | 0      |
| 2            | 0    | -0.704 | 0.356  |
| 2            | 1    | -0.417 | -0.438 |
| 2            | 2    | 0.042  | -0.002 |
| 2            | 3    | 0.097  | -0.012 |
| 2            | 4    | 0.147  | -0.014 |
| 2            | 5    | 0.106  | 0.01   |
| 2            | 6    | 2.922  | 0.03   |
| 2            | 7    | -1.48  | 1.22   |
| 2            | 8    | -2.22  | -2.016 |
| 2            | 9    | 0.37   | 0.183  |
| 2            | 10   | 0.116  | 0.028  |
| 2            | 11   | -0.075 | 0.081  |
| 2            | 12   | 0.023  | -0.007 |
| 2            | 13   | 0.086  | 0.153  |
| 2            | 14   | -0.093 | 0.042  |
| 2            | 15   | 0.252  | 0.001  |
| 2            | 16   | -0.242 | 0.209  |
| 2            | 17   | 0.033  | -0.024 |
| 2            | 18   | -0.095 | -0.07  |
| 2            | 19   | -0.133 | -0.066 |

|   |    |        |        |
|---|----|--------|--------|
| 2 | 20 | -0.278 | -0.249 |
| 2 | 21 | -0.309 | -0.432 |
| 2 | 22 | -0.042 | -0.035 |
| 2 | 23 | -0.383 | 0.393  |
| 2 | 24 | 0.123  | -0.013 |
| 2 | 25 | 0.34   | 0.024  |
| 2 | 26 | 0.006  | -0.001 |
| 2 | 27 | -0.006 | 0.005  |
| 2 | 28 | -0.01  | 0.001  |
| 2 | 29 | 0.076  | -0.043 |
| 2 | 30 | -0.086 | 0.082  |
| 2 | 31 | 0.102  | -0.037 |
| 2 | 32 | -0.014 | 0.012  |
| 2 | 33 | 0.006  | 0.012  |
| 2 | 34 | 0.001  | 0      |
| 2 | 35 | 0      | 0.005  |
| 2 | 36 | -0.003 | -0.007 |
| 2 | 37 | -0.002 | 0      |
| 2 | 38 | -0.007 | -0.009 |
| 2 | 39 | -0.025 | 0      |

### Complex 3 (NCO<sup>-</sup>)

| Multiplicity | Root | D      | E      |
|--------------|------|--------|--------|
| 4            | 1    | -29.79 | -1.499 |
| 4            | 2    | 5.914  | -7.547 |
| 4            | 3    | 1.716  | 0.124  |
| 4            | 4    | 5.683  | 4.623  |
| 4            | 5    | 0.196  | -0.318 |
| 4            | 6    | -0.001 | -0.003 |
| 4            | 7    | -0.024 | 0.004  |
| 4            | 8    | 0.037  | -0.03  |
| 4            | 9    | -0.036 | 0.001  |
| 2            | 0    | 0.449  | -0.381 |
| 2            | 1    | 0.726  | 0.343  |
| 2            | 2    | 0.109  | 0.005  |
| 2            | 3    | 0.097  | -0.005 |
| 2            | 4    | 0.476  | 0.001  |
| 2            | 5    | 0.523  | 0.25   |
| 2            | 6    | 2.056  | 0.06   |
| 2            | 7    | -1.043 | 1.347  |
| 2            | 8    | -2.073 | -1.929 |

|   |    |        |        |
|---|----|--------|--------|
| 2 | 9  | -0.2   | 0.193  |
| 2 | 10 | -0.007 | 0.028  |
| 2 | 11 | 0.249  | 0.057  |
| 2 | 12 | -0.11  | 0.182  |
| 2 | 13 | 0.631  | 0.028  |
| 2 | 14 | -0.065 | 0.091  |
| 2 | 15 | -0.012 | -0.043 |
| 2 | 16 | -0.155 | 0.098  |
| 2 | 17 | 0.187  | 0      |
| 2 | 18 | -0.032 | -0.036 |
| 2 | 19 | 0.317  | 0.029  |
| 2 | 20 | -0.721 | -0.705 |
| 2 | 21 | -0.179 | 0.003  |
| 2 | 22 | -0.342 | 0.342  |
| 2 | 23 | 0.02   | -0.02  |
| 2 | 24 | 0.023  | 0.043  |
| 2 | 25 | 0.331  | 0.035  |
| 2 | 26 | -0.001 | -0.002 |
| 2 | 27 | -0.009 | -0.01  |
| 2 | 28 | -0.04  | -0.006 |
| 2 | 29 | 0.061  | 0.01   |
| 2 | 30 | 0.032  | -0.075 |
| 2 | 31 | -0.057 | 0.07   |
| 2 | 32 | 0.017  | -0.001 |
| 2 | 33 | -0.008 | 0.008  |
| 2 | 34 | -0.001 | 0.001  |
| 2 | 35 | 0.016  | 0.004  |
| 2 | 36 | -0.012 | 0.005  |
| 2 | 37 | -0.008 | -0.002 |
| 2 | 38 | 0.039  | 0.004  |
| 2 | 39 | -0.016 | -0.011 |

### Complex 4a (NCS<sup>-</sup>)

| Multiplicity | Root | D       | E      |
|--------------|------|---------|--------|
| 4            | 1    | -31.293 | -1.774 |
| 4            | 2    | 5.376   | -7.889 |
| 4            | 3    | -0.863  | -1.786 |
| 4            | 4    | 6.122   | 6.396  |
| 4            | 5    | 0.277   | -0.277 |
| 4            | 6    | 0.015   | -0.025 |
| 4            | 7    | 0.002   | -0.021 |
| 4            | 8    | -0.015  | -0.013 |
| 4            | 9    | -0.013  | -0.001 |

|   |    |        |        |
|---|----|--------|--------|
| 2 | 0  | 1.169  | 0.666  |
| 2 | 1  | -0.701 | -0.316 |
| 2 | 2  | 0.007  | -0.006 |
| 2 | 3  | 0.204  | -0.012 |
| 2 | 4  | 0.381  | 0.003  |
| 2 | 5  | 0.085  | 0.018  |
| 2 | 6  | 2.489  | 0.249  |
| 2 | 7  | -1.023 | 1.358  |
| 2 | 8  | -2.028 | -2.053 |
| 2 | 9  | -0.175 | 0.372  |
| 2 | 10 | 0.361  | 0.002  |
| 2 | 11 | 0.032  | 0.006  |
| 2 | 12 | -0.025 | 0.046  |
| 2 | 13 | 0.405  | 0.129  |
| 2 | 14 | 0.04   | 0.101  |
| 2 | 15 | -0.073 | 0.007  |
| 2 | 16 | -0.054 | 0.107  |
| 2 | 17 | 0.126  | 0.009  |
| 2 | 18 | -0.041 | 0.006  |
| 2 | 19 | 0.173  | 0.104  |
| 2 | 20 | -0.731 | -0.851 |
| 2 | 21 | -0.264 | 0.139  |
| 2 | 22 | -0.239 | 0.217  |
| 2 | 23 | 0.015  | -0.019 |
| 2 | 24 | 0.017  | 0.054  |
| 2 | 25 | 0.338  | 0.011  |
| 2 | 26 | -0.001 | -0.003 |
| 2 | 27 | -0.01  | -0.01  |
| 2 | 28 | 0.023  | 0.009  |
| 2 | 29 | 0.071  | 0.002  |
| 2 | 30 | 0.065  | -0.028 |
| 2 | 31 | -0.105 | 0.015  |
| 2 | 32 | 0.011  | 0.004  |
| 2 | 33 | -0.011 | 0.018  |
| 2 | 34 | 0      | 0.001  |
| 2 | 35 | 0.006  | 0.004  |
| 2 | 36 | -0.015 | -0.006 |
| 2 | 37 | -0.006 | -0.007 |
| 2 | 38 | 0.026  | 0.015  |
| 2 | 39 | -0.007 | -0.004 |

#### Complex 4b (NCS<sup>-</sup>)

| Multiplicity | Root | D       | E      |
|--------------|------|---------|--------|
| 4            | 1    | -27.584 | -2.097 |
| 4            | 2    | 4.723   | -8.002 |

|   |    |        |        |
|---|----|--------|--------|
| 4 | 3  | -1.589 | -1.325 |
| 4 | 4  | 6.892  | 6.197  |
| 4 | 5  | -0.423 | -0.344 |
| 4 | 6  | 0.071  | 0.054  |
| 4 | 7  | -0.002 | 0.003  |
| 4 | 8  | 0.032  | 0.014  |
| 4 | 9  | -0.021 | -0.008 |
| 2 | 0  | -0.466 | -0.604 |
| 2 | 1  | -0.08  | 0.57   |
| 2 | 2  | 0.158  | 0.003  |
| 2 | 3  | 0.01   | -0.001 |
| 2 | 4  | 0.418  | 0.077  |
| 2 | 5  | -0.022 | 0.064  |
| 2 | 6  | 2.84   | 0.011  |
| 2 | 7  | -1.192 | 1.144  |
| 2 | 8  | -1.833 | -1.279 |
| 2 | 9  | -0.266 | 0.26   |
| 2 | 10 | 0.451  | 0.066  |
| 2 | 11 | 0.001  | 0      |
| 2 | 12 | 0.221  | 0.05   |
| 2 | 13 | 0.117  | 0.017  |
| 2 | 14 | 0.213  | 0.125  |
| 2 | 15 | -0.005 | -0.008 |
| 2 | 16 | -0.122 | 0.084  |
| 2 | 17 | -0.012 | -0.076 |
| 2 | 18 | 0.119  | 0.014  |
| 2 | 19 | -0.077 | -0.131 |
| 2 | 20 | -0.802 | -0.585 |
| 2 | 21 | -0.065 | -0.059 |
| 2 | 22 | -0.374 | 0.293  |
| 2 | 23 | -0.04  | -0.044 |
| 2 | 24 | 0.041  | 0.014  |
| 2 | 25 | 0.376  | 0.011  |
| 2 | 26 | -0.002 | 0.001  |
| 2 | 27 | -0.006 | -0.005 |
| 2 | 28 | 0.101  | 0.014  |
| 2 | 29 | 0.13   | -0.016 |
| 2 | 30 | -0.096 | -0.056 |
| 2 | 31 | -0.07  | 0.04   |
| 2 | 32 | 0.018  | 0.004  |
| 2 | 33 | -0.002 | 0.013  |
| 2 | 34 | 0.001  | 0      |
| 2 | 35 | -0.004 | 0.008  |
| 2 | 36 | -0.009 | 0.006  |
| 2 | 37 | -0.001 | 0      |

|   |    |        |        |
|---|----|--------|--------|
| 2 | 38 | 0.005  | -0.002 |
| 2 | 39 | -0.001 | -0.01  |

### Complex 5 ( $N_3^-$ )

| Multiplicity | Root | D       | E      |
|--------------|------|---------|--------|
| 4            | 1    | -26.488 | -2.068 |
| 4            | 2    | 4.418   | -7.103 |
| 4            | 3    | 3.782   | 4.571  |
| 4            | 4    | 2.058   | 0.594  |
| 4            | 5    | 0.086   | -0.181 |
| 4            | 6    | 0.022   | -0.03  |
| 4            | 7    | 0.004   | -0.016 |
| 4            | 8    | -0.009  | -0.013 |
| 4            | 9    | -0.019  | -0.001 |
| 2            | 0    | 0.358   | -0.056 |
| 2            | 1    | -0.124  | 0.391  |
| 2            | 2    | 0.066   | -0.01  |
| 2            | 3    | 0.21    | -0.014 |
| 2            | 4    | 0.339   | -0.003 |
| 2            | 5    | -0.031  | 0.108  |
| 2            | 6    | 2.445   | 0.29   |
| 2            | 7    | -0.816  | 1.305  |
| 2            | 8    | -2.167  | -2.098 |
| 2            | 9    | -0.253  | 0.289  |
| 2            | 10   | 0.106   | 0.013  |
| 2            | 11   | 0.439   | 0.012  |
| 2            | 12   | 0.095   | 0.063  |
| 2            | 13   | 0.255   | 0.158  |
| 2            | 14   | -0.038  | 0.119  |
| 2            | 15   | -0.009  | -0.056 |
| 2            | 16   | -0.133  | 0.099  |
| 2            | 17   | 0.165   | -0.002 |
| 2            | 18   | -0.057  | -0.062 |
| 2            | 19   | 0.195   | 0.08   |
| 2            | 20   | -0.598  | -0.661 |
| 2            | 21   | -0.108  | -0.107 |
| 2            | 22   | -0.464  | 0.452  |
| 2            | 23   | -0.024  | -0.038 |
| 2            | 24   | 0.049   | 0.051  |
| 2            | 25   | 0.376   | 0.017  |
| 2            | 26   | 0       | -0.002 |
| 2            | 27   | -0.008  | -0.01  |
| 2            | 28   | -0.011  | -0.025 |
| 2            | 29   | 0.087   | -0.001 |



|   |    |        |        |
|---|----|--------|--------|
| 2 | 30 | 0.079  | -0.065 |
| 2 | 31 | -0.099 | 0.076  |
| 2 | 32 | 0.005  | 0.002  |
| 2 | 33 | -0.009 | 0.011  |
| 2 | 34 | -0.001 | 0.001  |
| 2 | 35 | 0.006  | 0.006  |
| 2 | 36 | -0.012 | 0.002  |
| 2 | 37 | -0.005 | -0.007 |
| 2 | 38 | 0.013  | 0.016  |
| 2 | 39 | -0.002 | -0.013 |
